# Supplementary material
Source: publisher site journal article supplement (https://www.dovepress.com/article/603459)
Supplement: Supplementary file 1 [file 603459_Supplementary%20materials_1.docx]

**Supplementary materials**

**Association Between Hemostatic Profiles and** **Hypertensive Disorders of Pregnancy: A Multi-omics Mendelian Randomization Study**

Yixuan Li1*; Xianglin Long1*; Yeshen Zhang1*; Shan Tu1; Wenzhi Luo1; Xiaoyan Wang1; Lixiong Zeng1; Fei Ye1; Xu Deng1**#**; Zhihui Zhang1#

1 Department of Cardiology, The Third Xiangya Hospital of Central South University, Changsha, 410013, China.

*The first three authors were considered equally in this work.

# These authors were considered as corresponding authors.

Corresponding address:

Zhihui Zhang, Department of Cardiology, The Third Xiangya Hospital of Central South University, Changsha, 410013, People’s Republic of China. Email: zhangzhihui0869@csu.edu.cn.

Xu Deng, Department of Cardiology, The Third Xiangya Hospital of Central South University, Changsha, 410013, People’s Republic of China. Email: dengxu@csu.edu.cn.

**Figure S1.** MR analysis of the effect of vWF on preeclampsia. (A) Forest plot of SNP-specific causal estimates using IVW and MR-Egger methods. (B) Funnel plot assessing heterogeneity and potential directional pleiotropy. (C) Forest plot for SNP-specific estimates in the leave-one-out sensitivity analysis. (D) Scatter plot of SNP effects on vWF vs. preeclampsia, with causal estimates from multiple MR methods.


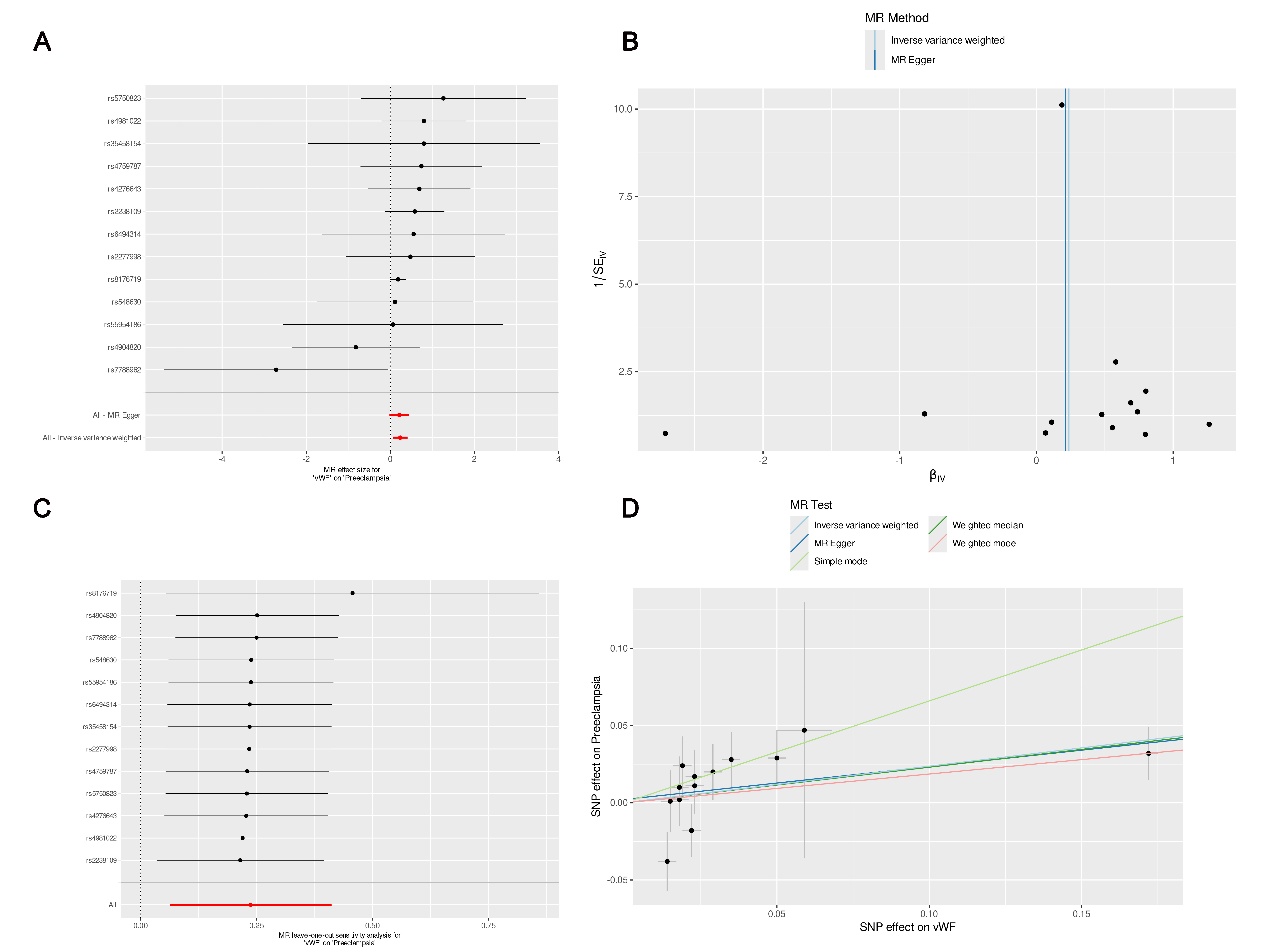


**Figure S2.** MR analysis of the effect of FVIII on preeclampsia. (A) Forest plot of SNP-specific causal estimates using IVW and MR-Egger methods. (B) Funnel plot assessing heterogeneity and potential directional pleiotropy. (C) Forest plot for SNP-specific estimates in the leave-one-out sensitivity analysis. (D) Scatter plot of SNP effects on FVIII vs. preeclampsia, with causal estimates from multiple MR methods.


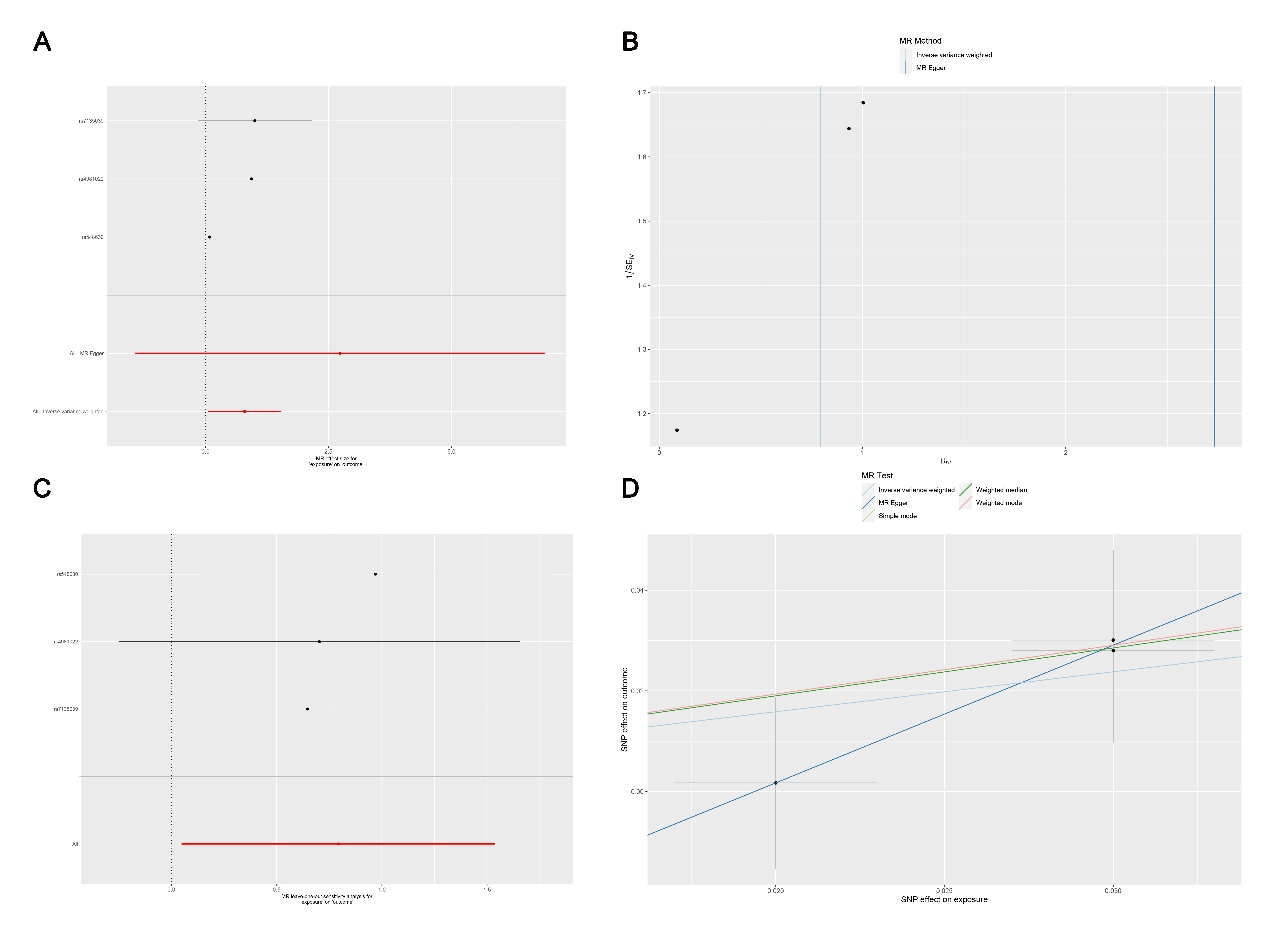


**Figure S3.** MR analysis of the effect of protein C on preeclampsia. (A) Forest plot of SNP-specific causal estimates using IVW and MR-Egger methods. (B) Funnel plot assessing heterogeneity and potential directional pleiotropy. (C) Forest plot for SNP-specific estimates in the leave-one-out sensitivity analysis. (D) Scatter plot of SNP effects on protein C vs. preeclampsia, with causal estimates from multiple MR methods.


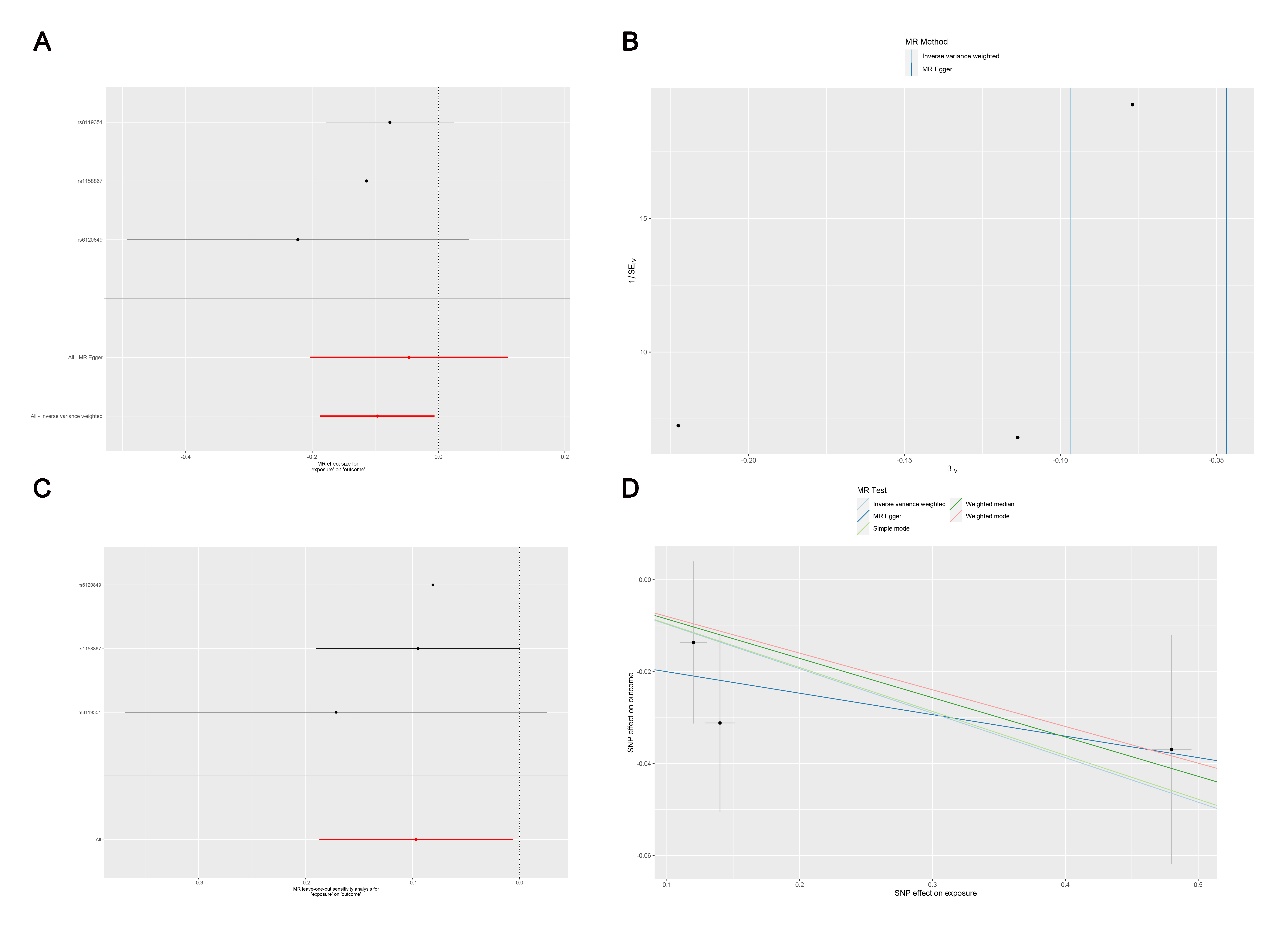


**Figure S4.** MR analysis of the effect of circulating protein vWF on preeclampsia. (A) Forest plot of SNP-specific causal estimates using IVW and MR-Egger methods. (B) Funnel plot assessing heterogeneity and potential directional pleiotropy. (C) Forest plot for SNP-specific estimates in the leave-one-out sensitivity analysis. (D) Scatter plot of SNP effects on circulating protein vWF vs. preeclampsia, with causal estimates from multiple MR methods.


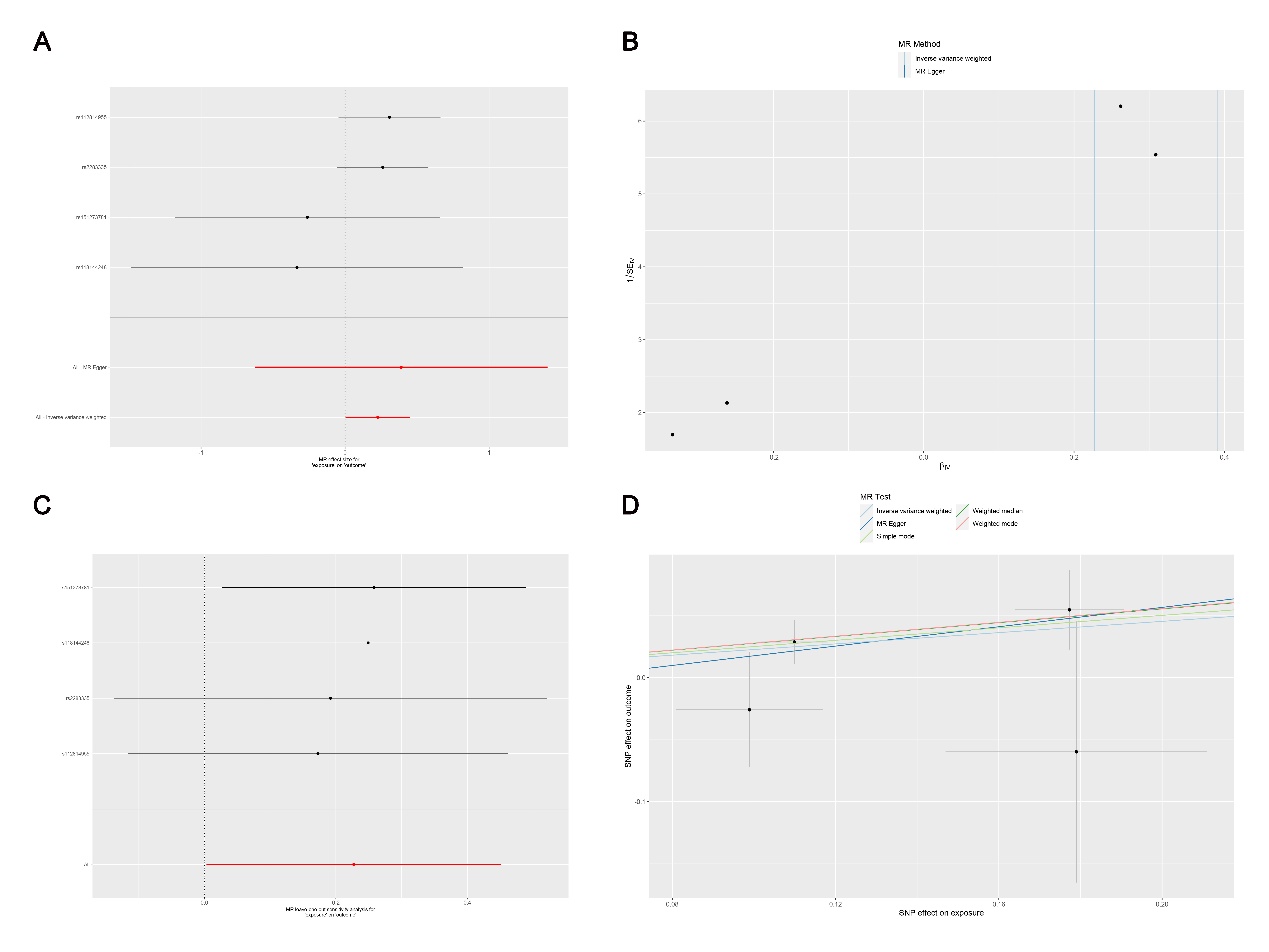


**Figure S5.** MR analysis of the effect of circulating protein FII on preeclampsia. (A) Forest plot of SNP-specific causal estimates using IVW and MR-Egger methods. (B) Funnel plot assessing heterogeneity and potential directional pleiotropy. (C) Scatter plot of SNP effects on circulating protein FII vs. preeclampsia, with causal estimates from IVW methods.


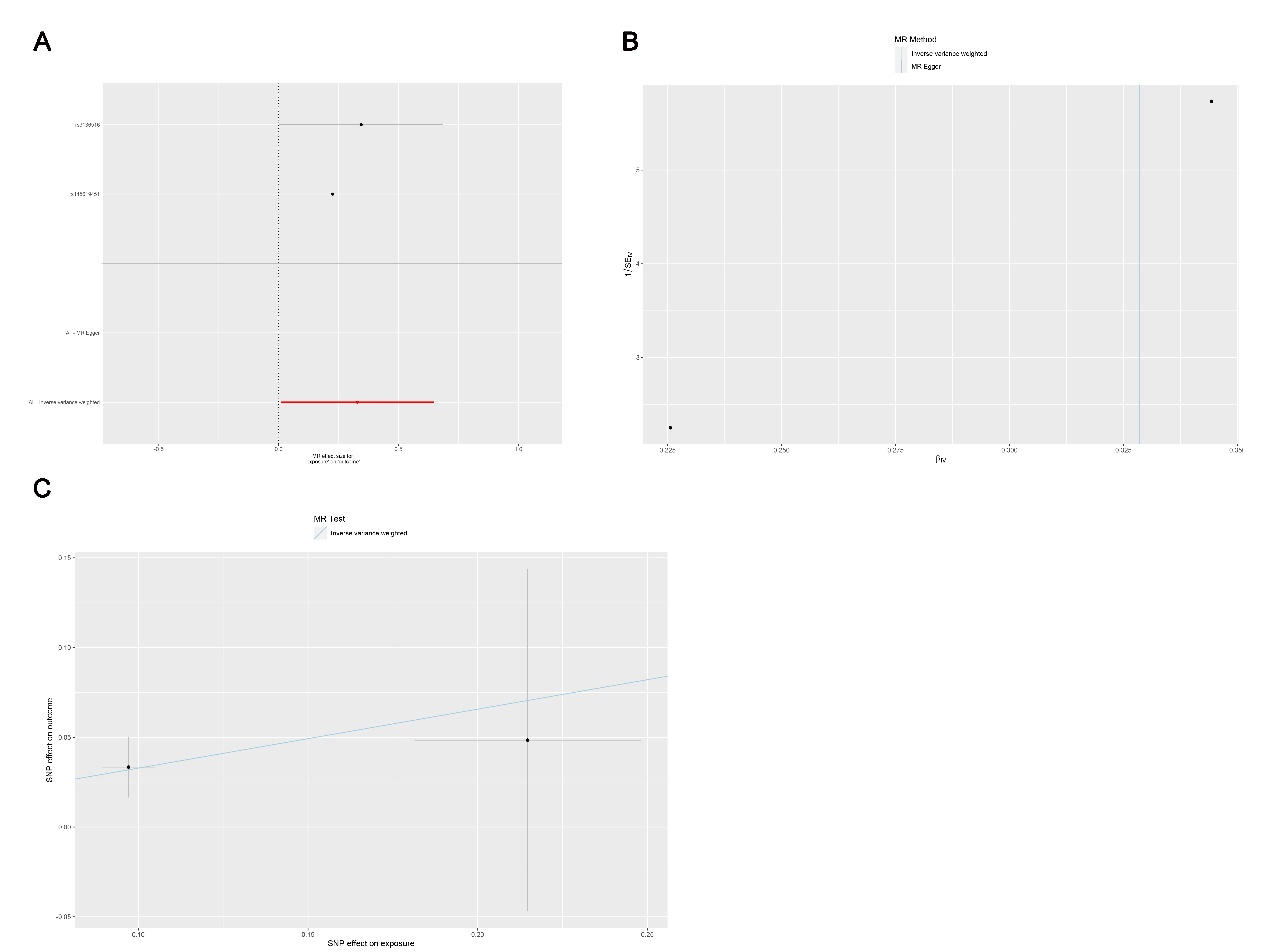


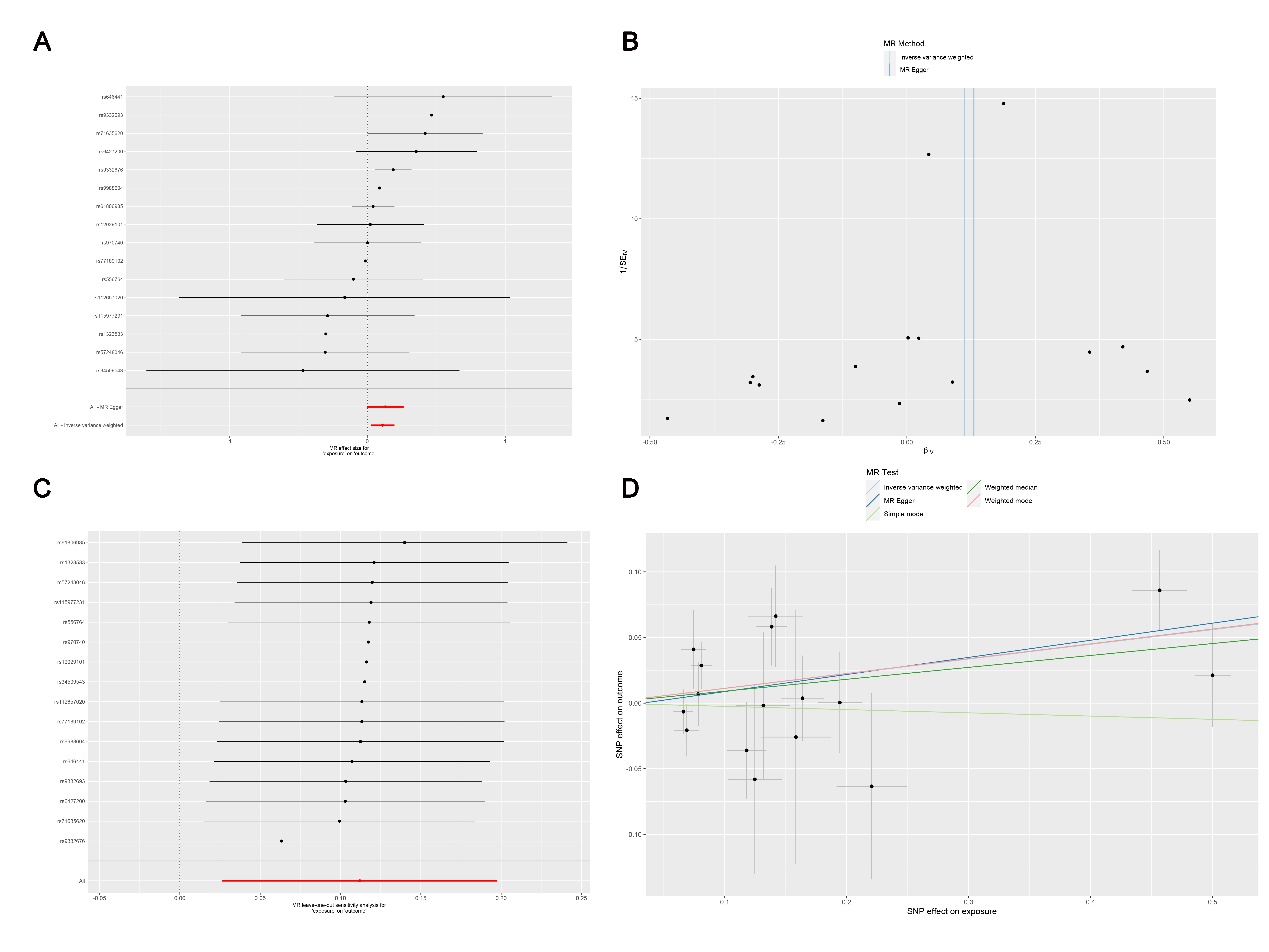
**Figure S6.** MR analysis of the effect of circulating protein FV on preeclampsia. (A) Forest plot of SNP-specific causal estimates using IVW and MR-Egger methods. (B) Funnel plot assessing heterogeneity and potential directional pleiotropy. (C) Forest plot for SNP-specific estimates in the leave-one-out sensitivity analysis. (D) Scatter plot of SNP effects on circulating protein FV vs. preeclampsia, with causal estimates from multiple MR methods.

**Table S1 STROBE-MR checklist of recommended items to address in reports of Mendelian randomization studies1, 2**

| Item No. | Section | Checklist item | Location addressed |
| --- | --- | --- | --- |
| 1 | **TITLE and ABSTRACT** | Indicate Mendelian randomization (MR) as the study’s design in the title and/or the abstract if that is a main purpose of the study | Title and abstract |
|  | **INTRODUCTION** |  |  |
| 2 | **Background** | Explain the scientific background and rationale for the reported study. What is the exposure? Is a potential causal relationship between exposure and outcome plausible? Justify why MR is a helpful method to address the study question | Introduction |
| 3 | **Objectives** | State specific objectives clearly, including pre-specified causal hypotheses (if any). State that MR is a method that, under specific assumptions, intends to estimate causal effects | Introduction |
|  | **METHODS** |  |  |
| 4 | **Study design and data sources** | Present key elements of the study design early in the article. Consider including a table listing sources of data for all phases of the study. For each data source contributing to the analysis, describe the following: |  |
|  | a) | Setting: Describe the study design and the underlying population, if possible. Describe the setting, locations, and relevant dates, including periods of recruitment, exposure, follow-up, and data collection, when available. | Methods; Graphical abstracts;  Figure 1;  Table S2 |
|  | b) | Participants: Give the eligibility criteria, and the sources and methods of selection of participants. Report the sample size, and whether any power or sample size calculations were carried out prior to the main analysis | Methods;  Table S2 |
|  | c) | Describe measurement, quality control and selection of genetic variants | Methods |
|  | d) | For each exposure, outcome, and other relevant variables, describe methods of assessment and diagnostic criteria for diseases | Methods |
|  | e) | Provide details of ethics committee approval and participant informed consent, if relevant | Ethical approval |
| 5 | **Assumptions** | Explicitly state the three core IV assumptions for the main analysis (relevance, independence and exclusion restriction) as well assumptions for any additional or sensitivity analysis | Methods |
| 6 | **Statistical methods: main analysis** | Describe statistical methods and statistics used |  |
|  | a) | Describe how quantitative variables were handled in the analyses (i.e., scale, units, model) | Methods; Figures |
|  | b) | Describe how genetic variants were handled in the analyses and, if applicable, how their weights were selected | Methods |
|  | c) | Describe the MR estimator (e.g. two-stage least squares, Wald ratio) and related statistics. Detail the included covariates and, in case of two-sample MR, whether the same covariate set was used for adjustment in the two samples | Methods |
|  | d) | Explain how missing data were addressed | Methods |
|  | e) | If applicable, indicate how multiple testing was addressed | Methods |
| 7 | **Assessment of assumptions** | Describe any methods or prior knowledge used to assess the assumptions or justify their validity | Methods |
| 8 | **Sensitivity analyses and additional analyses** | Describe any sensitivity analyses or additional analyses performed (e.g. comparison of effect estimates from different approaches, independent replication, bias analytic techniques, validation of instruments, simulations) | Methods |
| 9 | **Software and pre-registration** |  |  |
|  | a) | Name statistical software and package(s), including version and settings used | Methods |
|  | b) | State whether the study protocol and details were pre-registered (as well as when and where) | N/A |
|  | **RESULTS** |  |  |
| 10 | **Descriptive data** |  |  |
|  | a) | Report the numbers of individuals at each stage of included studies and reasons for exclusion. Consider use of a flow diagram | Methods |
|  | b) | Report summary statistics for phenotypic exposure(s), outcome(s), and other relevant variables (e.g. means, SDs, proportions) | N/A |
|  | c) | If the data sources include meta-analyses of previous studies, provide the assessments of heterogeneity across these studies | N/A |
|  | d) | For two-sample MR: | Methods; Results; Tables S3-S10 |
|  |  | i. Provide justification of the similarity of the genetic variant-exposure associations between the exposure and outcome samples |  |
|  |  | ii.  Provide information on the number of individuals who overlap between the exposure and outcome studies |  |
| 11 | **Main results** |  |  |
|  | a) | Report the associations between genetic variant and exposure, and between genetic variant and outcome, preferably on an interpretable scale | Results; Tables S3-S10 |
|  | b) | Report MR estimates of the relationship between exposure and outcome, and the measures of uncertainty from the MR analysis, on an interpretable scale, such as odds ratio or relative risk per SD difference | Results; Figure 2 |
|  | c) | If relevant, consider translating estimates of relative risk into absolute risk for a meaningful time period | N/A |
|  | d) | Consider plots to visualize results (e.g. forest plot, scatter plot of associations between genetic variants and outcome versus between genetic variants and exposure) | Figures S1-S6 |
| 12 | **Assessment of assumptions** |  |  |
|  | a) | Report the assessment of the validity of the assumptions | Results |
|  | b) | Report any additional statistics (e.g., assessments of heterogeneity across genetic variants, such as I2, Q statistic or E-value) | Tables 1-2 |
| 13 | **Sensitivity analyses and additional analyses** |  |  |
|  | a) | Report any sensitivity analyses to assess the robustness of the main results to violations of the assumptions | Results; Tables S5-S8 |
|  | b) | Report results from other sensitivity analyses or additional analyses | Results |
|  | c) | Report any assessment of direction of causal relationship (e.g., bidirectional MR) | Results; Tables S6 and S10 |
|  | d) | When relevant, report and compare with estimates from non-MR analyses | N/A |
|  | e) | Consider additional plots to visualize results (e.g., leave-one-out analyses) | Figures S1-S6 |
|  | **DISCUSSION** |  |  |
| 14 | **Key results** | Summarize key results with reference to study objectives | Discussion |
| 15 | **Limitations** | Discuss limitations of the study, taking into account the validity of the IV assumptions, other sources of potential bias, and imprecision. Discuss both direction and magnitude of any potential bias and any efforts to address them | Discussion |
| 16 | **Interpretation** |  |  |
|  | a) | Meaning: Give a cautious overall interpretation of results in the context of their limitations and in comparison with other studies | Discussion |
|  | b) | Mechanism: Discuss underlying biological mechanisms that could drive a potential causal relationship between the investigated exposure and the outcome, and whether the gene-environment equivalence assumption is reasonable. Use causal language carefully, clarifying that IV estimates may provide causal effects only under certain assumptions | Discussion |
|  | c) | Clinical relevance: Discuss whether the results have clinical or public policy relevance, and to what extent they inform effect sizes of possible interventions | Discussion |
| 17 | **Generalizability** | Discuss the generalizability of the study results (a) to other populations, (b) across other exposure periods/timings, and (c) across other levels of exposure | Discussion |
|  | **OTHER INFORMATION** |  |  |
| 18 | **Funding** | Describe sources of funding and the role of funders in the present study and, if applicable, sources of funding for the databases and original study or studies on which the present study is based | Funding |
| 19 | **Data and data sharing** | Provide the data used to perform all analyses or report where and how the data can be accessed, and reference these sources in the article. Provide the statistical code needed to reproduce the results in the article, or report whether the code is publicly accessible and if so, where | Data availability |
| 20 | **Conflicts of Interest** | All authors should declare all potential conflicts of interest | Disclosure of interest |

This checklist is copyrighted by the Equator Network under the Creative Commons Attribution 3.0 Unported (CC BY 3.0) license.

1. Skrivankova VW, Richmond RC, Woolf BAR, Yarmolinsky J, Davies NM, Swanson SA, et al. Strengthening the Reporting of Observational Studies in Epidemiology using Mendelian Randomization (STROBE-MR) Statement. JAMA. 2021 Oct 26;326(16):1614-1621.

2. Skrivankova VW, Richmond RC, Woolf BAR, Davies NM, Swanson SA, VanderWeele TJ, et al. Strengthening the Reporting of Observational Studies in Epidemiology using Mendelian Randomization (STROBE-MR): Explanation and Elaboration. BMJ. 2021;375:n2233

**Table S2 Data sources for coagulation factors and hypertensive disorders of pregnancy**

| Pathway | Phenotype | Sample Size | Ancestry | Study | PMID | Consortium |
| --- | --- | --- | --- | --- | --- | --- |
| Platelet adhesion | vWF | 42,256 | European | Sabater-Lleal M | 30586737 | CHARGE |
| ADAMTS13 | 2,304 | European | Ma Q | 29296746 | TSS |
| Extrinsic pathway | FVII | 27,495 | European | de Vries PS | 30642921 | CHARGE |
| PT | 30,972 | European | Goldstein JA | 33175840 | BioVU + MGI |
| Intrinsic pathway | APTT | 9,240 | European | Tang W | 22703881 | ARIC |
| FVIII | 29,573 | European | Sabater-Lleal M | 30586737 | CHARGE |
| FXI | 997 | European | Suhre K | 28240269 | KORA F4 |
| Common pathway | FX | 3,301 | European | Sun BB | 29875488 | INTERVAL |
| ETP | 1,967 | European | Rocanin-Arjo A | 24357727 | MARTHA + 3C |
| Dissolution of fibrin clot | Protein C | 8,084 | European | Tang W | 20802025 | ARIC |
| D-dimer | 21,052 | European | Smith NL | 21502573 | CHARGE |
| — | Hypertensive disorders of pregnancy | Case: 16,417  Control: 213,893 | European | Kurki MI | 36653562 | FinnGen_R10 |
| — | Gestational hypertension | Case: 9,535  Control: 211,957 | European | Kurki MI | 36653562 | FinnGen_R10 |
| — | Preeclampsia | Case: 7,377  Control: 211,957 | European | Kurki MI | 36653562 | FinnGen_R10 |

Abbreviations: CHARGE, Cohorts for Heart and Aging Research in Genomic Epidemiology; TSS, Trinity Student Study; MGI, Michigan Genomics Initiative; ARIC, Atherosclerosis Risk in Communities; KORA, Cooperative Health Research in the Region of Augsburg; INTERVAL, International Network against VENous Thrombosis; MARTHA, Marseille Thrombosis Association study; 3C, Three Cities Study; vWF, von Willebrand factor; ADAMTS13, a disintegrin and metalloproteinase with a thrombospondin type 1 motif, member 13; FVII, Factor VII; PT, prothrombin time; APTT, activated partial thromboplastin time; FVIII, Factor VIII; FXI, Factor XI; FX, Factor X; ETP, endogenous thrombin potential.

**Table S3 Selected instrument SNPs of coagulation factors in Two-Sample MR**

| Exposure | SNP | Mapped gene(s) | Effect allele | Beta | Se | P value | F-statistics | MR_keep | Reasons for SNP exclusion* |
| --- | --- | --- | --- | --- | --- | --- | --- | --- | --- |
| vWF | rs55954186 | KCTD6, PDHB | A | 0.015 | 0.003 | 8.72E-09 | 25 | TRUE |  |
| rs548630 | FCHO2, TMEM171 | A | -0.018 | 0.003 | 1.33E-12 | 36 | TRUE |  |
| rs80082277 | NELFE | C | -0.054 | 0.01 | 3.20E-08 | 29.16 | FALSE | ②③ |
| rs9390460 | STXBP5 | T | -0.033 | 0.003 | 6.32E-38 | 121 | FALSE | ② |
| rs7788962 | ALDH7A1P3, GIMAP7 | A | -0.014 | 0.003 | 6.29E-08 | 21.78 | TRUE |  |
| rs4276643 | SCARA5 | T | -0.029 | 0.003 | 5.77E-27 | 93.44 | TRUE |  |
| rs10985344 | DAB2IP | A | 0.017 | 0.003 | 4.11E-09 | 32.11 | FALSE | ② |
| rs8176719 | ABO | T | -0.172 | 0.003 | p<1E-320 | 3287.11 | TRUE |  |
| rs35458154 | ST3GAL4, KIRREL3 | A | 0.059 | 0.009 | 6.35E-12 | 42.98 | TRUE |  |
| rs2238109 | VWF | A | 0.05 | 0.003 | 1.37E-82 | 277.78 | TRUE |  |
| rs4981022 | STAB2 | A | 0.035 | 0.003 | 5.44E-37 | 136.11 | TRUE |  |
| rs4759787 | STX2 | A | 0.023 | 0.003 | 4.45E-18 | 58.78 | TRUE |  |
| rs4904820 | TC2N | A | 0.022 | 0.003 | 8.30E-18 | 53.78 | TRUE |  |
| rs6494314 | NPM1P47, C2CD4B | T | -0.018 | 0.003 | 9.63E-08 | 36 | TRUE |  |
| rs2277998 | CLEC4M | A | -0.023 | 0.003 | 2.02E-15 | 58.78 | TRUE |  |
| rs5750823 | TAB1 | T | -0.019 | 0.003 | 2.98E-11 | 40.11 | TRUE |  |
| ADAMTS13 | rs28680325 | ADAMTS13 | A | 0.067 | 0.005 | 1.30E-42 | 179.56 | TRUE |  |
| rs144473590 | ADAMTS13 | C | -0.265 | 0.019 | 2.30E-34 | 191.92 | FALSE | ① |
| rs3118671 | ADAMTS13 | T | -0.039 | 0.006 | 3.00E-10 | 41.51 | TRUE |  |
| rs11244061 | ABO, Y_RNA | T | -0.057 | 0.009 | 4.60E-10 | 40.87 | FALSE | ② |
| rs9411492 | — | C | 0.03 | 0.006 | 1.80E-08 | 30.15 | TRUE |  |
| APTT | rs9332701 | F5 | G | 0.54 | 0.1 | 3.70E-08 | 29.16 | TRUE |  |
| rs710446 | HRG-AS1, KNG1 | C | -1.19 | 0.04 | 1.06E-185 | 885.06 | TRUE |  |
| rs9898 | HRG-AS1, HRG | T | -1.01 | 0.04 | 1.65E-116 | 637.56 | TRUE |  |
| rs2289252 | F11, F11-AS1 | T | -0.48 | 0.04 | 4.30E-30 | 144 | TRUE |  |
| rs1593 | F11 | T | 0.54 | 0.06 | 1.25E-17 | 81 | TRUE |  |
| rs2545801 | F12, GRK6 | T | 1.55 | 0.05 | 4.13E-60 | 961 | TRUE |  |
| rs2050190 | TSBP1,  TSBP1-AS1 | G | -0.25 | 0.04 | 1.29E-08 | 39.06 | FALSE | ② |
| rs687621 | ABO | G | -0.82 | 0.04 | 3.64E-81 | 420.25 | FALSE | ② |
| FVIII | rs548630 | FCHO2, TMEM171 | A | -0.02 | 0.003 | 5.14E-10 | 44.44 | TRUE |  |
| rs9399599 | STXBP5 | A | -0.02 | 0.003 | 3.73E-13 | 44.44 | FALSE | ② |
| rs7816579 | SCARA5 | A | 0.02 | 0.003 | 5.32E-16 | 44.44 | FALSE | ④ |
| rs7135039 | VWF | T | 0.03 | 0.003 | 3.00E-19 | 100 | TRUE |  |
| rs4981022 | STAB2 | A | 0.03 | 0.003 | 1.16E-17 | 100 | TRUE |  |
| FXI | rs5030062 | HRG-AS1, KNG1 | C | 0.56 | 0.04 | 3.00E-40 | 196 | TRUE |  |
| rs1318130 | — | C | -0.4 | 0.07 | 2.11E-08 | 32.65 | TRUE |  |
| rs7624355 | HRG-AS1 | T | -0.31 | 0.054 | 1.26E-08 | 32.96 | TRUE |  |
| rs2289252 | F11, F11-AS1 | T | 0.44 | 0.042 | 4.60E-25 | 109.75 | TRUE |  |
| rs4253248 | KLKB1 | A | 0.24 | 0.042 | 8.52E-09 | 32.65 | TRUE |  |
| rs4253421 | F11 | G | 0.61 | 0.065 | 5.32E-20 | 88.07 | TRUE |  |
| PT | rs491098 | F7 | C | -0.29 | 0.011 | 2.80E-147 | 695.04 | TRUE |  |
| rs2069940 | PROCR, EDEM2 | C | -0.14 | 0.013 | 5.20E-29 | 115.98 | TRUE |  |
| rs6027 | F5 | T | 0.17 | 0.015 | 5.90E-29 | 128.44 | TRUE |  |
| rs1801690 | APOH | C | -0.12 | 0.016 | 3.30E-13 | 56.25 | TRUE |  |
| rs4399232 | JMJD1C | T | -0.053 | 0.0074 | 9.30E-13 | 51.3 | FALSE | ② |
| rs819167 | — | A | 0.093 | 0.014 | 4.90E-11 | 44.13 | TRUE |  |
| rs7901813 | PLXDC2 | A | 0.05 | 0.0081 | 6.50E-10 | 38.1 | TRUE |  |
| rs6120472 | — | T | 0.088 | 0.015 | 2.10E-09 | 34.42 | TRUE |  |
| FVII | rs569557 | F7 | G | 0.16 | 0.003 | 6.4E-600 | 2844.44 | TRUE |  |
| rs7935829 | MS4A6A | G | 0.02 | 0.002 | 6.30E-18 | 100 | TRUE |  |
| rs6532796 | ADH5, ADH4 | G | 0.02 | 0.002 | 2.60E-13 | 100 | TRUE |  |
| rs1149616 | TSKU | T | 0.02 | 0.003 | 1.70E-10 | 44.44 | TRUE |  |
| ETP | rs58883118 | NUP160 | T | 0.17 | 0.019 | 2.03E-19 | 80.06 | TRUE |  |
| rs17787912 | — | G | -0.04 | 0.006 | 1.63E-11 | 44.44 | TRUE |  |
| rs35800856 | PTPRJ | A | 0.06 | 0.01 | 6.13E-09 | 36 | TRUE |  |
| Protein C | rs6120849 | EDEM2 | T | -0.14 | 0.011 | 7.00E-37 | 161.98 | TRUE |  |
| rs1158867 | PROC | C | -0.12 | 0.01 | 4.00E-36 | 144 | TRUE |  |
| rs17145713 | BAZ1B | T | -0.06 | 0.012 | 3.00E-08 | 25 | FALSE | ② |
| rs1260326 | GCKR | T | 0.08 | 0.01 | 2.04E-17 | 64 | FALSE | ② |
| rs8119351 | MMP24-AS1-EDEM2 | A | 0.48 | 0.015 | 2.68E-203 | 1024 | TRUE |  |
| D-dimer | rs12029080 | F3, SLC44A3-AS1 | G | 0.099 | 0.018 | 6.40E-52 | 30.25 | TRUE |  |
| rs6687813 | SLC19A2, F5 | A | 0.096 | 0.035 | 2.40E-14 | 7.52 | FALSE | ⑤ |
| rs13109457 | FGG, FGA | A | 0.061 | 0.019 | 2.90E-18 | 10.31 | TRUE |  |

*①: Rare SNPs (minor allele frequency < 0.01); ②: SNP associated with other potential confounders (body mass index, lipid, thyroid disease, cardiovascular disease, and metabolic diseases, etc.) by searching PhenoScanner (January 13, 2024); ③: SNP located in the major histocompatibility complex human leukocyte antigen region; ④: SNP was palindromic with intermediate allele frequencies; ⑤: SNPs with F-statistics < 10

Abbreviations: vWF, von Willebrand factor; ADAMTS13, a disintegrin and metalloproteinase with a thrombospondin type 1 motif, member 13; FVII, Factor VII; PT, prothrombin time; APTT, activated partial thromboplastin time; FVIII, Factor VIII; FXI, Factor XI; ETP, endogenous thrombin potential.

**Table S4 Effect estimates of the associations of genetic instrumental variables for coagulation factors with hypertensive disorders of pregnancy and its subtypes**

| Exposure | SNP | Chr | Position | Effect allele | Hypertensive disorders of pregnancy | | | Gestational hypertension | | | Preeclampsia | | |
| --- | --- | --- | --- | --- | --- | --- | --- | --- | --- | --- | --- | --- | --- |
| Beta | Se | P | Beta | Se | P | Beta | Se | P |
| vWF | rs55954186 | 3 | 58436476 | A | 0.011 | 0.013 | 0.431 | 0.019 | 0.017 | 0.283 | 0.001 | 0.02 | 0.947 |
| rs548630 | 5 | 72406659 | A | -0.001 | 0.012 | 0.905 | 0.009 | 0.015 | 0.536 | -0.002 | 0.017 | 0.919 |
| rs80082277 | - | - | C | - | - | - | - | - | - | - | - | - |
| rs9390460 | - | - | T | - | - | - | - | - | - | - | - | - |
| rs7788962 | 7 | 150227227 | A | 0.01 | 0.013 | 0.467 | 0.002 | 0.017 | 0.924 | 0.038 | 0.019 | 0.050 |
| rs4276643 | 8 | 27803599 | T | -0.004 | 0.012 | 0.762 | -0.003 | 0.016 | 0.843 | -0.02 | 0.018 | 0.270 |
| rs10985344 | - | - | A | - | - | - | - | - | - | - | - | - |
| rs8176719 | 9 | 136132908 | T | 0.014 | 0.012 | 0.221 | 0.031 | 0.015 | 0.041 | -0.032 | 0.017 | 0.056 |
| rs35458154 | 11 | 126296825 | A | 0.026 | 0.056 | 0.65 | 0.036 | 0.073 | 0.619 | 0.047 | 0.083 | 0.573 |
| rs2238109 | 12 | 6153967 | A | 0.012 | 0.012 | 0.323 | -0.011 | 0.016 | 0.464 | 0.029 | 0.018 | 0.106 |
| rs4759787 | 12 | 131290180 | A | 0.017 | 0.012 | 0.154 | 0.024 | 0.015 | 0.113 | 0.017 | 0.017 | 0.338 |
| rs4981022 | 12 | 104149874 | A | 0.007 | 0.012 | 0.582 | 0.01 | 0.016 | 0.537 | 0.028 | 0.018 | 0.125 |
| rs4904820 | 14 | 92318935 | A | -0.002 | 0.012 | 0.867 | 0.001 | 0.015 | 0.941 | -0.018 | 0.017 | 0.292 |
| rs6494314 | 15 | 62455019 | T | 0.003 | 0.014 | 0.807 | 0.005 | 0.018 | 0.755 | -0.01 | 0.02 | 0.603 |
| rs2277998 | 19 | 7831628 | A | -0.016 | 0.013 | 0.193 | -0.019 | 0.016 | 0.255 | -0.011 | 0.018 | 0.553 |
| rs5750823 | 22 | 39829973 | T | -0.016 | 0.013 | 0.214 | -0.007 | 0.017 | 0.681 | -0.024 | 0.019 | 0.201 |
| ADAMTS13 | rs28680325 | 9 | 136316367 | A | 0.002 | 0.012 | 0.897 | -0.012 | 0.016 | 0.451 | 0.009 | 0.018 | 0.606 |
| rs144473590 | - | - | C | - | - | - | - | - | - | - | - | - |
| rs3118671 | 9 | 136297407 | T | 0.031 | 0.020 | 0.118 | 0.031 | 0.026 | 0.234 | 0.046 | 0.029 | 0.115 |
| rs11244061 | - | - | T | - | - | - | - | - | - | - | - | - |
| rs9411492 | 9 | 136160617 | C | -0.004 | 0.012 | 0.739 | -0.005 | 0.016 | 0.774 | -0.022 | 0.018 | 0.213 |
| APTT | rs9332701 | 1 | 167751391 | G | 0 | 0.029 | 0.99 | -0.059 | 0.038 | 0.115 | 0.008 | 0.043 | 0.856 |
| rs710446 | 3 | 187942621 | C | -0.006 | 0.012 | 0.635 | -0.012 | 0.015 | 0.418 | -0.006 | 0.017 | 0.731 |
| rs9898 | 3 | 187873321 | T | -0.003 | 0.013 | 0.818 | -0.004 | 0.017 | 0.832 | -0.01 | 0.019 | 0.581 |
| rs2289252 | 4 | 187444375 | T | -0.011 | 0.012 | 0.363 | -0.006 | 0.015 | 0.695 | -0.029 | 0.017 | 0.086 |
| rs1593 | 4 | 187432545 | T | 0.001 | 0.018 | 0.968 | -0.02 | 0.023 | 0.398 | 0.018 | 0.027 | 0.499 |
| rs2545801 | 5 | 176773945 | T | -0.024 | 0.013 | 0.064 | -0.038 | 0.017 | 0.027 | -0.024 | 0.019 | 0.211 |
| rs2050190 | - | - | G | - | - | - | - | - | - | - | - | - |
| rs687621 | - | - | G | - | - | - | - | - | - | - | - | - |
| FVIII | rs548630 | 5 | 72406659 | A | -0.001 | 0.012 | 0.905 | 0.009 | 0.015 | 0.536 | -0.002 | 0.017 | 0.919 |
| rs9399599 | - | - | A | - | - | - | - | - | - | - | - | - |
| rs7816579 | 8 | 27805815 | A | -0.004 | 0.012 | 0.756 | -0.003 | 0.016 | 0.838 | -0.02 | 0.018 | 0.269 |
| rs7135039 | 12 | 6160614 | T | 0.015 | 0.012 | 0.211 | -0.003 | 0.016 | 0.849 | 0.03 | 0.018 | 0.091 |
| rs4981022 | 12 | 104149874 | A | 0.007 | 0.012 | 0.582 | 0.01 | 0.016 | 0.537 | 0.028 | 0.018 | 0.125 |
| FXI | rs5030062 | 3 | 186454180 | C | -0.008 | 0.012 | 0.503 | -0.017 | 0.016 | 0.282 | -0.012 | 0.018 | 0.487 |
| rs1318130 | 3 | 186466859 | C | 0.017 | 0.018 | 0.356 | -0.005 | 0.023 | 0.843 | 0.029 | 0.027 | 0.278 |
| rs7624355 | 3 | 186427340 | T | -0.009 | 0.014 | 0.507 | 0.003 | 0.018 | 0.87 | -0.013 | 0.021 | 0.539 |
| rs2289252 | 4 | 187207381 | T | -0.011 | 0.012 | 0.363 | -0.006 | 0.015 | 0.695 | -0.029 | 0.017 | 0.086 |
| rs4253248 | 4 | 187155488 | A | -0.014 | 0.012 | 0.241 | 0.001 | 0.015 | 0.963 | -0.032 | 0.017 | 0.061 |
| rs4253421 | 4 | 187204937 | G | 0.014 | 0.015 | 0.372 | 0.025 | 0.02 | 0.209 | 0 | 0.023 | 0.995 |
| PT | rs491098 | 13 | 113769346 | C | -0.014 | 0.021 | 0.520 | -0.005 | 0.027 | 0.857 | -0.008 | 0.031 | 0.787 |
| rs2069940 | 20 | 33759272 | C | -0.007 | 0.017 | 0.697 | 0.012 | 0.022 | 0.579 | -0.036 | 0.025 | 0.150 |
| rs6027 | 1 | 169483561 | T | 0.043 | 0.021 | 0.039 | 0.032 | 0.027 | 0.235 | 0.086 | 0.031 | 0.005 |
| rs1801690 | 17 | 64208285 | C | 0 | 0.022 | 0.987 | 0.017 | 0.028 | 0.553 | 0.007 | 0.032 | 0.837 |
| rs4399232 | - | - | T | - | - | - | - | - | - | - | - | - |
| rs819167 | 20 | 32903687 | A | 0.024 | 0.020 | 0.235 | 0.022 | 0.026 | 0.385 | 0.005 | 0.029 | 0.867 |
| rs7901813 | 10 | 20198915 | A | -0.007 | 0.013 | 0.611 | -0.003 | 0.017 | 0.875 | -0.020 | 0.020 | 0.311 |
| rs6120472 | 20 | 32566975 | T | 0.01 | 0.021 | 0.626 | 0.014 | 0.027 | 0.601 | -0.008 | 0.031 | 0.800 |
| FVII | rs569557 | 13 | 113769917 | G | 0.015 | 0.021 | 0.482 | 0.006 | 0.027 | 0.828 | 0.011 | 0.031 | 0.730 |
| rs7935829 | 11 | 59942815 | G | 0.022 | 0.013 | 0.089 | -0.006 | 0.016 | 0.719 | -0.002 | 0.018 | 0.891 |
| rs6532796 | 4 | 100042242 | G | -0.008 | 0.013 | 0.522 | 0.002 | 0.016 | 0.908 | 0.038 | 0.019 | 0.042 |
| rs1149616 | 11 | 76498369 | T | 0.018 | 0.016 | 0.259 | -0.002 | 0.021 | 0.938 | 0.025 | 0.023 | 0.287 |
| EPT | rs58883118 | 11 | 47818310 | T | 0.068 | 0.078 | 0.382 | 0.031 | 0.102 | 0.761 | 0.264 | 0.114 | 0.021 |
| rs17787912 | 11 | 46947366 | G | -0.018 | 0.014 | 0.212 | -0.029 | 0.018 | 0.109 | -0.037 | 0.020 | 0.074 |
| rs35800856 | 11 | 48133397 | A | -0.033 | 0.023 | 0.154 | 0.004 | 0.030 | 0.903 | -0.053 | 0.033 | 0.110 |
| Protein C | rs6120849 | 20 | 33730387 | T | 0.032 | 0.013 | 0.016 | 0.03 | 0.017 | 0.082 | 0.031 | 0.019 | 0.107 |
| rs1158867 | 2 | 128177377 | C | -0.002 | 0.012 | 0.899 | 0.001 | 0.016 | 0.928 | 0.014 | 0.018 | 0.439 |
| rs17145713 | - | - | T | - | - | - | - | - | - | - | - | - |
| rs1260326 | - | - | T | - | - | - | - | - | - | - | - | - |
| rs8119351 | 20 | 33754405 | A | -0.007 | 0.017 | 0.693 | 0.011 | 0.022 | 0.616 | -0.037 | 0.025 | 0.139 |
| D-dimer | rs12029080 | 1 | 95053353 | G | 0.027 | 0.129 | 0.833 | -0.027 | 0.167 | 0.871 | 0.104 | 0.189 | 0.583 |
| rs6687813 | - | - | A | - | - | - | - | - | - | - | - | - |
| rs13109457 | 4 | 155514879 | A | 0.049 | 0.204 | 0.809 | 0.093 | 0.264 | 0.725 | -0.012 | 0.298 | 0.967 |

Abbreviations: SNP, single nucleotide polymorphisms; Chr, chromosome; vWF, von Willebrand factor; ADAMTS13, a disintegrin and metalloproteinase with a thrombospondin type 1 motif, member 13; FVII, Factor VII; PT, prothrombin time; APTT, activated partial thromboplastin time; FVIII, Factor VIII; FXI, Factor XI; FX, Factor X; ETP, endogenous thrombin potential.

**Table S5 Summary statistics of the MR estimates of coagulation factors on hypertensive disorders of pregnancy and its subtypes**

| Exposures | Outcomes | SNPs (n) | IVW  (random effects) | | Weighted Median | | MR-Egger | | MR-PRESSO | |
| --- | --- | --- | --- | --- | --- | --- | --- | --- | --- | --- |
| OR  (95% CI) | P value | OR  (95% CI) | P value | OR  (95% CI) | P value | OR  (95% CI) | P value |
| vWF | Hypertensive disorders of pregnancy | 13 | 1.306  (0.992, 1.718) | 0.057 | 1.247  (0.856, 1.817) | 0.251 | 1.340  (0.659, 2.725) | 0.437 | 1.306  (1.096, 1.555) | 0.011 |
| Gestational hypertension | 13 | 1.152  (0.808, 1.642) | 0.435 | 1.069  (0.678, 1.685) | 0.774 | 0.810  (0.323, 2.028) | 0.661 | 1.152  (0.882, 1.505) | 0.321 |
| Preeclampsia | 13 | 1.266  (1.061, 1.511) | 0.008 | 1.261  (1.044, 1.522) | 0.016 | 1.236  (0.967, 1.579) | 0.116 | 1.265  (1.059, 1.511) | 0.022 |
| ADAMTS13 | Hypertensive disorders of pregnancy | 3 | 0.926  (0.665, 1.287) | 0.646 | 0.982  (0.706, 1366) | 0.914 | 1.314  (0.421, 4.101) | 0.72 | - | - |
| Gestational hypertension | 3 | 0.795  (0.535, 1.182) | 0.258 | 0.841  (0.546, 1.295) | 0.431 | 0.914  (0.290, 2.881) | 0.903 | - | - |
| Preeclampsia | 3 | 0.889  (0.471, 1.678) | 0.717 | 0.916  (0.572, 1.467) | 0.715 | 2.659  (0.727, 9.725) | 0.379 | - | - |
| APTT | Hypertensive disorders of pregnancy | 6 | 0.997  (0.986, 1.007) | 0.53 | 1.002  (0.988, 1.017) | 0.763 | 0.977  (0.950, 1.005) | 0.186 | 0.997  (0.987, 1.006) | 0.52 |
| Gestational hypertension | 6 | 0.992  (0.975, 1.010) | 0.373 | 0.999  (0.980, 1.019) | 0.911 | 0.985  (0.937, 1.036) | 0.588 | 0.992  (0.975, 1.010) | 0.413 |
| Preeclampsia | 6 | 1.001  (0.985, 1.018) | 0.896 | 1.001  (0.981, 1.021) | 0.930 | 0.960  (0.921, 1.000) | 0.121 | 1.001  (0.985, 1.018) | 0.901 |
| FVIII | Hypertensive disorders of pregnancy | 3 | 1.367  (0.820, 2.276) | 0.23 | 1.352  (0.755, 2.421) | 0.31 | 2.661  (0.153, 46.236) | 0.623 | 1.265  (0.962, 1.663) | 0.191 |
| Gestational hypertension | 3 | 0.996  (0.515, 1.926) | 0.991 | 1.004  (0.479, 2.104) | 0.992 | 3.542  (0.089, 141.708) | 0.623 | 0.972  (0.706, 1.338) | 0.874 |
| Preeclampsia | 3 | 2.21  (1.049, 4.657) | 0.037 | 2.588  (1.085, 6.174) | 0.032 | 15.378  (0.238, 994.943) | 0.421 | 1.681  (0.745, 3.796) | 0.300 |
| FXI | Hypertensive disorders of pregnancy | 6 | 0.991  (0.967, 1.015) | 0.457 | 0.985  (0.954, 1.016) | 0.34 | 1.027  (0.947, 1.113) | 0.559 | 0.991  (0.969, 1.013) | 0.453 |
| Gestational hypertension | 6 | 0.997  (0.966, 1.029) | 0.87 | 0.988  (0.948, 1.031) | 0.579 | 1.006  (0.906, 1.117) | 0.918 | 0.997  (0.974, 1.022) | 0.839 |
| Preeclampsia | 6 | 0.968  (0.933, 1.003) | 0.076 | 0.976  (0.932, 1.021) | 0.292 | 1.035  (0.919, 1.165) | 0.600 | 0.968  (0.933, 1.003) | 0.136 |
| PT | Hypertensive disorders of pregnancy | 7 | 1.089  (0.988, 1.200) | 0.085 | 1.048  (0.930, 1.181) | 0.440 | 1.108  (0.914, 1.342) | 0.345 | 1.089  (1.008, 1.176) | 0.072 |
| Gestational hypertension | 7 | 1.032  (0.911, 1.170) | 0.617 | 1.015  (0.870, 1.185) | 0.849 | 1.03  (0.803, 1.321) | 0.823 | 1.032  (0.946, 1.127) | 0.500 |
| Preeclampsia | 7 | 1.125  (0.951, 1.330) | 0.170 | 1.039  (0.866, 1.247) | 0.679 | 1.247  (0.880, 1.768) | 0.269 | 1.125  (0.951, 1.330) | 0.219 |
| FVII | Hypertensive disorders of pregnancy | 4 | 1.14  (0.860, 1.510) | 0.362 | 1.118  (0.861, 1.453) | 0.403 | 1.04  (0.701, 1.544) | 0.862 | 1.14  (0.860, 1.510) | 0.429 |
| Gestational hypertension | 4 | 1.024  (0.746, 1.405) | 0.885 | 1.034  (0.753, 1.422) | 0.835 | 1.058  (0.704, 1.589) | 0.812 | 1.024  (0.948, 1.105) | 0.591 |
| Preeclampsia | 4 | 1.17  (0.751, 1.823) | 0.487 | 1.098  (0.754, 1.598) | 0.627 | 0.942  (0.566, 1.566) | 0.839 | 1.170  (0.751, 1.823) | 0.537 |
| ETP | Hypertensive disorders of pregnancy | 3 | 1.092  (0.575, 2.073) | 0.788 | 1.501  (0.848, 2.656) | 0.163 | 0.967  (0.098,9.578) | 0.982 | - | - |
| Gestational hypertension | 3 | 1.442  (0.813, 2.559) | 0.211 | 1.248  (0.638, 2.437) | 0.517 | 0.838  (0.193, 3.644) | 0.852 | - | - |
| Preeclampsia | 3 | 1.545  (0.385, 6.201) | 0.539 | 1.919  (0.776, 4.750) | 0.159 | 2.269  (0.016, 322.688) | 0.801 | - | - |
| Protein C | Hypertensive disorders of pregnancy | 3 | 0.965  (0.878, 1.062) | 0.468 | 0.984  (0.921, 1.051) | 0.627 | 1.014  (0.828, 1.241) | 0.917 | - | - |
| Gestational hypertension | 3 | 0.993  (0.897,1.100) | 0.899 | 1.015  (0.933, 1.104) | 0.728 | 1.069  (0.895, 1.277) | 0.596 | - | - |
| Preeclampsia | 3 | 0.908  (0.829, 0.994) | 0.036 | 0.918  (0.837, 1.007) | 0.069 | 0.954  (0.816, 1.116) | 0.663 | - | - |
| D-dimer | Hypertensive disorders of pregnancy | 2 | 1.034  (0.835,1.281) | 0.758 | - | - | - | - | - | - |
| Gestational hypertension | 2 | 1.007  (0.764, 1.328) | 0.959 | - | - | - | - | - | - |
| Preeclampsia | 2 | 1.073  (0.785, 1.467) | 0.658 | - | - | - | - | - | - |

*Removing rs8176719 that gave rise to drive the causal association according to the leave-one-out sensitivity analysis.

Abbreviations: SNP, single nucleotide polymorphisms; Chr, chromosome; vWF, von Willebrand factor; ADAMTS13, a disintegrin and metalloproteinase with a thrombospondin type 1 motif, member 13; FVII, Factor VII; PT, prothrombin time; APTT, activated partial thromboplastin time; FVIII, Factor VIII; FXI, Factor XI; FX, Factor X; ETP, endogenous thrombin potential; OR, odds ratio; CI, confidence interval.

**Table S6 MR Steiger test for the causal direction of coagulation factors on hypertensive disorders of pregnancy and its subtypes**

| Exposure | SNP | Chr | Position | Effect allele | Hypertensive disorders of pregnancy | | Gestational hypertension | | Preeclampsia | |
| --- | --- | --- | --- | --- | --- | --- | --- | --- | --- | --- |
| Causal direction | P | Causal direction | P | Causal direction | P |
| vWF | rs55954186 | 3 | 58436476 | A | TRUE | 1.82E-05 | TRUE | 3.30E-05 | TRUE | 5.33E-06 |
| rs548630 | 5 | 72406659 | A | TRUE | 4.56E-08 | TRUE | 1.52E-07 | TRUE | 4.97E-08 |
| rs80082277 | - | - | C | - | - | - | - | - | - |
| rs9390460 | - | - | T | - | - | - | - | - | - |
| rs7788962 | 7 | 150227227 | A | TRUE | 6.26E-05 | TRUE | 2.26E-05 | TRUE | 4.91E-04 |
| rs4276643 | 8 | 27803599 | T | TRUE | 1.90E-18 | TRUE | 1.70E-18 | TRUE | 4.29E-17 |
| rs10985344 | - | - | A | - | - | - | - | - | - |
| rs8176719 | 9 | 136132908 | T | - | - | - | - | TRUE | 0 |
| rs35458154 | 11 | 126296825 | A | TRUE | 5.03E-09 | TRUE | 6.35E-09 | TRUE | 7.69E-09 |
| rs2238109 | 12 | 6153967 | A | TRUE | 2.65E-50 | TRUE | 1.27E-50 | TRUE | 3.01E-48 |
| rs4759787 | 12 | 131290180 | A | TRUE | 8.90E-11 | TRUE | 1.66E-10 | TRUE | 3.28E-11 |
| rs4981022 | 12 | 104149874 | A | TRUE | 8.50E-26 | TRUE | 1.66E-25 | TRUE | 8.26E-24 |
| rs4904820 | 14 | 92318935 | A | TRUE | 2.50E-11 | TRUE | 2.24E-11 | TRUE | 3.17E-10 |
| rs6494314 | 15 | 62455019 | T | TRUE | 6.02E-08 | TRUE | 7.76E-08 | TRUE | 1.26E-07 |
| rs2277998 | 19 | 7831628 | A | TRUE | 6.45E-11 | TRUE | 5.09E-11 | TRUE | 1.20E-11 |
| rs5750823 | 22 | 39829973 | T | TRUE | 9.73E-08 | TRUE | 1.72E-08 | TRUE | 1.26E-07 |
| ADAMTS13 | rs28680325 | 9 | 136316367 | A | TRUE | 1.69E-39 | TRUE | 4.06E-39 | TRUE | 2.99E-39 |
| rs144473590 | - | - | C | - | - | - | - | - | - |
| rs3118671 | 9 | 136297407 | T | TRUE | 3.15E-10 | TRUE | 2.54E-10 | TRUE | 3.29E-10 |
| rs11244061 | - | - | T | - | - | - | - | - | - |
| rs9411492 | 9 | 136160617 | C | TRUE | 8.14E-07 | TRUE | 8.01E-07 | TRUE | 1.32E-06 |
| APTT | rs9332701 | 1 | 167751391 | G | TRUE | 1.23E-07 | TRUE | 6.60E-07 | TRUE | 1.52E-07 |
| rs710446 | 3 | 187942621 | C | TRUE | 2.91E-180 | TRUE | 3.90E-179 | TRUE | 3.22E-180 |
| rs9898 | 3 | 187873321 | T | TRUE | 7.14E-132 | TRUE | 1.06E-131 | TRUE | 6.34E-131 |
| rs2289252 | 4 | 187444375 | T | TRUE | 6.82E-31 | TRUE | 2.35E-31 | TRUE | 5.33E-30 |
| rs1593 | 4 | 187432545 | T | TRUE | 1.33E-18 | TRUE | 5.84E-18 | TRUE | 4.44E-18 |
| rs2545801 | 5 | 176773945 | T | TRUE | 1.28E-191 | TRUE | 2.54E-190 | TRUE | 1.08E-192 |
| rs2050190 | - | - | G | - | - | - | - | - | - |
| rs687621 | - | - | G | - | - | - | - | - | - |
| FVIII | rs548630 | 5 | 72406659 | A | TRUE | 4.55E-10 | TRUE | 1.47E-09 | TRUE | 4.93E-10 |
| rs9399599 | - | - | A | - | - | - | - | - | - |
| rs7816579 | 8 | 27805815 | A | TRUE | 6.86E-10 | TRUE | 6.02E-10 | TRUE | 4.22E-09 |
| rs7135039 | 12 | 6160614 | T | TRUE | 2.56E-19 | TRUE | 1.14E-20 | TRUE | 1.38E-18 |
| rs4981022 | 12 | 104149874 | A | TRUE | 2.90E-20 | TRUE | 4.51E-20 | TRUE | 8.52E-19 |
| FXI | rs5030062 | 3 | 186454180 | C | TRUE | 1.63E-41 | TRUE | 2.42E-41 | TRUE | 1.72E-41 |
| rs1318130 | 3 | 186466859 | C | TRUE | 2.05E-08 | TRUE | 1.56E-08 | TRUE | 2.21E-08 |
| rs7624355 | 3 | 186427340 | T | TRUE | 1.60E-08 | TRUE | 1.32E-08 | TRUE | 1.58E-08 |
| rs2289252 | 4 | 187207381 | T | TRUE | 1.87E-24 | TRUE | 1.34E-24 | TRUE | 3.35E-24 |
| rs4253248 | 4 | 187155488 | A | TRUE | 2.25E-08 | TRUE | 1.47E-08 | TRUE | 2.99E-08 |
| rs4253421 | 4 | 187204937 | G | TRUE | 4.80E-20 | TRUE | 6.12E-20 | TRUE | 2.82E-20 |
| PT | rs491098 | 13 | 113769346 | C | TRUE | 6.72E-132 | TRUE | 5.68E-133 | TRUE | 1.80E-132 |
| rs2069940 | 20 | 33759272 | C | TRUE | 2.05E-23 | TRUE | 4.78E-23 | TRUE | 1.09E-21 |
| rs6027 | 1 | 169483561 | T | TRUE | 3.37E-23 | TRUE | 2.16E-24 | TRUE | 6.35E-22 |
| rs1801690 | 17 | 64208285 | C | TRUE | 2.01E-12 | TRUE | 9.45E-12 | TRUE | 3.76E-12 |
| rs4399232 | - | - | T | - | - | - | - | - | - |
| rs819167 | 20 | 32903687 | A | TRUE | 5.66E-09 | TRUE | 3.29E-09 | TRUE | 7.37E-10 |
| rs7901813 | 10 | 20198915 | A | TRUE | 1.92E-08 | TRUE | 1.03E-08 | TRUE | 5.94E-08 |
| rs6120472 | 20 | 32566975 | T | TRUE | 9.34E-08 | TRUE | 1.09E-07 | TRUE | 6.61E-08 |
| FVII | rs569557 | 13 | 113769917 | G | TRUE | 0 | TRUE | 0 | TRUE | 0 |
| rs7935829 | 11 | 59942815 | G | TRUE | 2.54E-20 | TRUE | 1.32E-20 | TRUE | 6.91E-21 |
| rs6532796 | 4 | 100042242 | G | TRUE | 6.09E-19 | TRUE | 6.15E-21 | TRUE | 2.26E-18 |
| rs1149616 | 11 | 76498369 | T | TRUE | 3.01E-09 | TRUE | 3.85E-10 | TRUE | 3.07E-09 |
| ETP | rs58883118 | 11 | 47818310 | T | TRUE | 1.83E-18 | TRUE | 1.17E-18 | TRUE | 6.20E-18 |
| rs17787912 | 11 | 46947366 | G | TRUE | 8.19E-11 | TRUE | 1.04E-10 | TRUE | 1.18E-10 |
| rs35800856 | 11 | 48133397 | A | TRUE | 5.75E-09 | TRUE | 2.81E-09 | TRUE | 6.51E-09 |
| Protein C | rs6120849 | 20 | 33730387 | T | TRUE | 2.65E-33 | TRUE | 7.05E-34 | TRUE | 5.53E-34 |
| rs1158867 | 2 | 128177377 | C | TRUE | 8.33E-32 | TRUE | 8.47E-32 | TRUE | 3.95E-31 |
| rs17145713 | - | - | T | - | - | - | - | - | - |
| rs1260326 | - | - | T | - | - | - | - | - | - |
| rs8119351 | 20 | 33754405 | A | TRUE | 1.24E-207 | TRUE | 4.54E-207 | TRUE | 1.56E-204 |
| D-dimer | rs12029080 | 1 | 95053353 | G | TRUE | 1.97E-07 | TRUE | 1.92E-07 | TRUE | 3.58E-07 |
| rs6687813 | - | - | A | - | - | - | - | - | - |
| rs13109457 | 4 | 155514879 | A | TRUE | 2.67E-03 | TRUE | 1.32E-02 | TRUE | 2.26E-03 |

Abbreviations: SNP, single nucleotide polymorphisms; Chr, chromosome; vWF, von Willebrand factor; ADAMTS13, a disintegrin and metalloproteinase with a thrombospondin type 1 motif, member 13; FVII, Factor VII; PT, prothrombin time; APTT, activated partial thromboplastin time; FVIII, Factor VIII; FXI, Factor XI; FX, Factor X; ETP, endogenous thrombin potential.

**Table S7 Summary statistics of the MR estimates of genetically predicted circulating hemostatic factors on hypertensive disorders of pregnancy and its subtypes**

| Exposures | Outcomes | SNPs  (n) | IVW  (random effects) | | Weighted Median | | MR-Egger | | MR-PRESSO | |
| --- | --- | --- | --- | --- | --- | --- | --- | --- | --- | --- |
| OR  (95% CI) | P value | OR  (95% CI) | P value | OR  (95% CI) | P value | OR  (95% CI) | P value |
| FGG | Hypertensive disorders of pregnancy | 2 | 0.928  (0.791, 1.090) | 0.363 | - | - | - | - | - | - |
| Gestational hypertension | 2 | 0.883  (0.718, 1.086) | 0.238 | - | - | - | - | - | - |
| Preeclampsia | 2 | 0.961  (0.761, 1.214) | 0.740 | - | - | - | - | - | - |
| FII | Hypertensive disorders of pregnancy | 2 | 1.217  (0.978, 1.514) | 0.078 | - | - | - | - | - | - |
| Gestational hypertension | 2 | 1.259  (0.949, 1.670) | 0.110 | - | - | - | - | - | - |
| Preeclampsia | 2 | 1.389  (1.010, 1.910) | 0.043 | - | - | - | - | - | - |
| FV | Hypertensive disorders of pregnancy | 16 | 1.044  (0.987, 1.104) | 0.135 | 1.078  (0.996, 1.167) | 0.064 | 1.031  (0.947, 1.123) | 0.489 | 1.047  (0.998, 1.098) | 0.078 |
| Gestational hypertension | 16 | 1.059  (0.985, 1.139) | 0.122 | 1.041  (0.944, 1.149) | 0.416 | 1.051  (0.940, 1.176) | 0.396 | 1.058  (0.990, 1.129) | 0.114 |
| Preeclampsia | 16 | 1.119  (1.027, 1.219) | 0.010 | 1.095  (0.980, 1.223) | 0.108 | 1.139  (0.997, 1.302) | 0.076 | 1.115  (1.032, 1.205) | 0.015 |
| FVII | Hypertensive disorders of pregnancy | 27 | 1.002  (0.968, 1.037) | 0.914 | 0.994  (0.949, 1.040) | 0.785 | 1.022  (0.969, 1.078) | 0.432 | 1.000  (0.967, 1.034) | 0.996 |
| Gestational hypertension | 27 | 1.005  (0.955, 1.056) | 0.861 | 0.996  (0.934, 1.062) | 0.897 | 0.994  (0.919, 1.075) | 0.879 | 1.003  (0.956, 1.051) | 0.915 |
| Preeclampsia | 27 | 1.008  (0.958, 1.062) | 0.749 | 0.996  (0.934, 1.063) | 0.915 | 1.049  (0.969, 1.134) | 0.247 | 1.004  (0.954, 1.058) | 0.868 |
| FX | Hypertensive disorders of pregnancy | 5 | 1.054  (0.922, 1.204) | 0.443 | 1.051  (0.903, 1.224) | 0.518 | 1.049  (0.812, 1.354) | 0.740 | 1.013  (0.933, 1.099) | 0.775 |
| Gestational hypertension | 5 | 1.063  (0.895, 1.263) | 0.487 | 1.051  (0.869, 1.271) | 0.61 | 0.950  (0.683, 1.323) | 0.782 | 1.009  (0.899, 1.173) | 0.883 |
| Preeclampsia | 5 | 1.115  (0.918, 1.355) | 0.273 | 1.122  (0.901, 1.397) | 0.303 | 1.240  (0.853, 1.802) | 0.341 | 1.077  (0.983, 1.181) | 0.172 |
| FXI | Hypertensive disorders of pregnancy | 14 | 1.026  (0.930, 1.131) | 0.610 | 1.078  (0.959, 1.211) | 0.210 | 1.175  (0.982, 1.406) | 0.103 | 0.998  (0.940, 1.060) | 0.951 |
| Gestational hypertension | 14 | 1.021  (0.877, 1.190) | 0.787 | 1.130  (0.967, 1.321) | 0.126 | 1.382  (1.085, 1.760) | 0.022 | 1.007  (0.915, 1.156) | 0.886 |
| Preeclampsia | 14 | 0.930  (0.810, 1.069) | 0.308 | 0.963  (0.816, 1.138) | 0.661 | 1.062  (0.810, 1.392) | 0.671 | 0.922  (0.882, 0.964) | 0.075 |
| FXIII | Hypertensive disorders of pregnancy | 17 | 0.982  (0.930, 1.037) | 0.5186 | 0.987  (0.927, 1.051) | 0.681 | 0.954  (0.858, 1.060) | 0.393 | 0.982  (0.937, 1.030) | 0.473 |
| Gestational hypertension | 17 | 1.007  (0.935, 1.083) | 0.865 | 1.026  (0.945, 1.113) | 0.541 | 0.979  (0.846, 1.133) | 0.782 | 1.006  (0.933, 1.086) | 0.867 |
| Preeclampsia | 17 | 0.962  (0.888, 1.042) | 0.339 | 0.951  (0.867, 1.043) | 0.287 | 0.913  (0.782, 1.066) | 0.267 | 0.964  (0.897, 1.036) | 0.301 |
| ADAMTS13 | Hypertensive disorders of pregnancy | 42 | 0.988  (0.953, 1.024) | 0.495 | 0.969  (0.922, 1.018) | 0.209 | 0.985  (0.924, 1.049) | 0.636 | 0.988  (0.953, 1.023) | 0.478 |
| Gestational hypertension | 42 | 0.993  (0.948, 1.041) | 0.77 | 0.965  (0.902, 1.033) | 0.302 | 1.019  (0.939, 1.106) | 0.647 | 0.993  (0.951, 1.037) | 0.756 |
| Preeclampsia | 42 | 0.988  (0.937, 1.041) | 0.649 | 0.981  (0.907, 1.061) | 0.631 | 0.965  (0.880, 1.059) | 0.461 | 0.988  (0.935, 1.044) | 0.650 |
| PAI-1 | Hypertensive disorders of pregnancy | 3 | 0.840  (0.660, 1.069) | 0.155 | 0.829  (0.619, 1.112) | 0.212 | 0.299  (0.013, 6.965) | 0.590 | - | - |
| Gestational hypertension | 3 | 0.885  (0.586, 1.336) | 0.56 | 0.812  (0.544, 1.212) | 0.309 | 0.058  (0.000, 9.260) | 0.47 | - | - |
| Preeclampsia | 3 | 0.991  (0.942, 1.043) | 0.728 | 0.974  (0.898, 1.057) | 0.531 | 0.975  (0.892, 1.065) | 0.572 | 0.994  (0.945, 1.046) | 0.834 |
| Protein C | Hypertensive disorders of pregnancy | 4 | 0.992  (0.868, 1.134) | 0.910 | 0.993  (0.862, 1.143) | 0.919 | 0.942  (0.609, 1.456) | 0.814 | 0.992  (0.927, 1.062) | 0.839 |
| Gestational hypertension | 4 | 0.943  (0.793, 1.120) | 0.502 | 0.946  (0.787, 1.138) | 0.558 | 0.786  (0.440, 1.405) | 0.502 | 0.942  (0.798, 1.113) | 0.520 |
| Preeclampsia | 4 | 0.987  (0.812, 1.199) | 0.894 | 0.969  (0.789, 1.191) | 0.767 | 0.771  (0.409, 1.454) | 0.506 | 0.987  (0.872, 1.118) | 0.844 |
| tPA | Hypertensive disorders of pregnancy | 7 | 1.109  (0.985, 1.248) | 0.086 | 1.115  (0.958, 1.297) | 0.160 | 1.182  (0.988, 1.413) | 0.127 | 1.109  (1.020, 1.205) | 0.049 |
| Gestational hypertension | 7 | 1.139  (0.978, 1.326) | 0.094 | 1.142  (0.951, 1.371) | 0.155 | 1.082  (0.859, 1.362) | 0.534 | 1.139  (1.047, 1.240) | 0.024 |
| Preeclampsia | 7 | 1.014  (0.850, 1.211) | 0.875 | 0.966  (0.764, 1.223) | 0.775 | 1.190  (0.916, 1.546) | 0.249 | 1.014  (0.841, 1.223) | 0.880 |
| vWF | Hypertensive disorders of pregnancy | 4 | 1.140  (0.897, 1.450) | 0.285 | 1.181  (0.994, 1.403) | 0.058 | 1.439  (0.412, 5.023) | 0.626 | 1.140  (0.897, 1.450) | 0.363 |
| Gestational hypertension | 4 | 0.966  (0.762, 1.224) | 0.772 | 0.989  (0.781, 1.251) | 0.925 | 1.654  (0.597, 4.586) | 0.435 | 0.965  (0.765, 1.217) | 0.791 |
| Preeclampsia | 4 | 1.255  (1.003, 1.570) | 0.047 | 1.320  (1.026, 1.697) | 0.031 | 1.477  (0.535, 4.079) | 0.530 | 1.255  (1.036, 1.521) | 0.106 |

Abbreviations: SNP, single nucleotide polymorphisms; Chr, chromosome; FGG, Fibrinogen gamma chain; FII, Factor II; FV, Factor V; FVII, Factor VII; FX, Factor X; FXI, Factor XI; FXIII, Factor XIII; ADAMTS13, a disintegrin and metalloproteinase with a thrombospondin type 1 motif, member 13; PAI_1, Plasminogen activator inhibitor-1; tPA, tissue plasminogen activator; vWF, von Willebrand factor.

**Table S8 Effect estimates of the associations of genetic instrumental variables for genetically predicted circulating hemostatic factors with hypertensive disorders of pregnancy and its subtypes**

| Exposure | SNP | Chr | Position | Effect allele | Hypertensive disorders of pregnancy | | | Gestational hypertension | | | Preeclampsia | | |
| --- | --- | --- | --- | --- | --- | --- | --- | --- | --- | --- | --- | --- | --- |
| Beta | Se | P | Beta | Se | P | Beta | Se | P |
| FGG | rs144431619 | 4 | 154255972 | G | -0.033 | 0.033 | 0.312 | -0.037 | 0.043 | 0.382 | -0.024 | 0.048 | 0.616 |
| rs4220 | 4 | 154570607 | A | -0.009 | 0.015 | 0.540 | -0.019 | 0.020 | 0.344 | -0.004 | 0.022 | 0.860 |
| FII | rs145619451 | 11 | 47533716 | G | -0.023 | 0.066 | 0.727 | -0.033 | 0.086 | 0.702 | -0.048 | 0.095 | 0.612 |
| rs3136516 | 11 | 46739206 | A | -0.020 | 0.012 | 0.080 | -0.023 | 0.015 | 0.117 | -0.033 | 0.017 | 0.048 |
| FV | rs112657020 | 1 | 168636503 | G | 0.001 | 0.067 | 0.985 | -0.109 | 0.088 | 0.217 | 0.026 | 0.097 | 0.789 |
| rs115977231 | 1 | 169097491 | A | 0.036 | 0.049 | 0.459 | 0.021 | 0.063 | 0.737 | 0.063 | 0.071 | 0.372 |
| rs12029101 | 1 | 169491627 | T | 0.023 | 0.022 | 0.295 | 0.061 | 0.029 | 0.032 | 0.004 | 0.032 | 0.907 |
| rs1323533 | 1 | 168530981 | A | 0.008 | 0.014 | 0.556 | 0.019 | 0.018 | 0.275 | -0.021 | 0.020 | 0.301 |
| rs2420378 | 1 | 169600680 | T | -0.010 | 0.012 | 0.393 | -0.006 | 0.015 | 0.669 | -0.012 | 0.017 | 0.463 |
| rs34509543 | 1 | 170213185 | T | 0.062 | 0.049 | 0.206 | 0.080 | 0.064 | 0.211 | 0.058 | 0.072 | 0.421 |
| rs556764 | 1 | 170137030 | T | -0.002 | 0.012 | 0.869 | -0.014 | 0.015 | 0.341 | -0.007 | 0.017 | 0.699 |
| rs57248046 | 1 | 168723042 | C | -0.005 | 0.025 | 0.833 | -0.004 | 0.032 | 0.893 | 0.036 | 0.037 | 0.328 |
| rs61806985 | 1 | 169330603 | T | 0.011 | 0.027 | 0.673 | -0.007 | 0.035 | 0.838 | -0.021 | 0.039 | 0.590 |
| rs6427200 | 1 | 169554468 | A | -0.006 | 0.012 | 0.632 | -0.002 | 0.016 | 0.885 | -0.029 | 0.018 | 0.112 |
| rs646441 | 1 | 168693114 | A | -0.042 | 0.021 | 0.041 | -0.051 | 0.027 | 0.058 | -0.041 | 0.030 | 0.171 |
| rs71635620 | 1 | 169341843 | T | 0.002 | 0.020 | 0.927 | -0.004 | 0.026 | 0.872 | 0.058 | 0.030 | 0.049 |
| rs77189102 | 1 | 168930454 | G | 0.002 | 0.039 | 0.957 | 0.016 | 0.050 | 0.746 | -0.002 | 0.056 | 0.973 |
| rs9332676 | 1 | 169513067 | A | -0.044 | 0.021 | 0.033 | -0.033 | 0.027 | 0.215 | -0.086 | 0.031 | 0.005 |
| rs9332693 | 1 | 169550066 | G | 0.027 | 0.026 | 0.301 | 0.039 | 0.034 | 0.257 | 0.066 | 0.039 | 0.086 |
| rs970740 | 1 | 169510736 | T | 0.030 | 0.026 | 0.260 | 0.017 | 0.034 | 0.616 | 0.000 | 0.038 | 0.991 |
| rs9988604 | 1 | 169196278 | G | 0.000 | 0.017 | 0.984 | -0.010 | 0.021 | 0.641 | 0.007 | 0.024 | 0.775 |
| FVII | rs1033863 | 13 | 113099137 | A | 0.004 | 0.012 | 0.749 | 0.000 | 0.016 | 0.978 | 0.005 | 0.018 | 0.774 |
| rs116851664 | 13 | 112622069 | G | -0.012 | 0.036 | 0.738 | -0.066 | 0.047 | 0.161 | 0.014 | 0.053 | 0.793 |
| rs117665124 | 13 | 112732215 | C | -0.145 | 0.064 | 0.022 | -0.152 | 0.082 | 0.066 | -0.142 | 0.093 | 0.128 |
| rs118007472 | 13 | 113348720 | A | 0.013 | 0.060 | 0.824 | 0.019 | 0.078 | 0.804 | 0.005 | 0.087 | 0.951 |
| rs12429090 | 13 | 114051824 | T | 0.044 | 0.066 | 0.506 | 0.152 | 0.085 | 0.073 | -0.004 | 0.096 | 0.968 |
| rs139507429 | 13 | 114038677 | T | 0.073 | 0.038 | 0.055 | 0.071 | 0.049 | 0.148 | 0.119 | 0.055 | 0.032 |
| rs14067 | 13 | 113456345 | G | -0.001 | 0.013 | 0.918 | -0.001 | 0.016 | 0.950 | 0.012 | 0.018 | 0.501 |
| rs144043422 | 13 | 112949484 | T | -0.017 | 0.072 | 0.814 | -0.082 | 0.094 | 0.384 | -0.031 | 0.104 | 0.766 |
| rs147800745 | 13 | 112879323 | A | 0.043 | 0.059 | 0.467 | 0.020 | 0.077 | 0.797 | 0.052 | 0.085 | 0.540 |
| rs149440031 | 13 | 113215099 | A | 0.025 | 0.032 | 0.425 | 0.076 | 0.041 | 0.062 | -0.011 | 0.047 | 0.814 |
| rs185808004 | 13 | 112811300 | C | -0.057 | 0.046 | 0.211 | -0.047 | 0.060 | 0.434 | -0.053 | 0.066 | 0.426 |
| rs186877688 | 13 | 113828127 | A | 0.108 | 0.055 | 0.049 | 0.187 | 0.067 | 0.005 | -0.037 | 0.080 | 0.645 |
| rs192102174 | 13 | 113064852 | A | -0.042 | 0.044 | 0.345 | -0.051 | 0.057 | 0.373 | -0.077 | 0.065 | 0.236 |
| rs2873421 | 13 | 112644812 | G | -0.016 | 0.012 | 0.204 | -0.035 | 0.016 | 0.030 | -0.017 | 0.018 | 0.358 |
| rs34459411 | 13 | 113030019 | G | 0.005 | 0.019 | 0.800 | 0.019 | 0.024 | 0.421 | 0.005 | 0.027 | 0.866 |
| rs4907474 | 13 | 112949591 | G | -0.009 | 0.020 | 0.649 | -0.011 | 0.026 | 0.670 | -0.004 | 0.029 | 0.884 |
| rs497845 | 13 | 113083189 | G | 0.028 | 0.047 | 0.547 | 0.065 | 0.060 | 0.277 | -0.035 | 0.068 | 0.607 |
| rs61967871 | 13 | 113245133 | A | -0.043 | 0.038 | 0.258 | 0.026 | 0.049 | 0.601 | -0.191 | 0.059 | 0.001 |
| rs6577066 | 13 | 112163363 | ATCACCCACAGCCATCTCACAAAGACTT | 0.000 | 0.026 | 0.999 | 0.005 | 0.034 | 0.876 | -0.053 | 0.039 | 0.168 |
| rs72663544 | 13 | 113084799 | CGTCCCTCACCGCATAATGCGGTGCCCGTCCCTCACCGC | -0.019 | 0.017 | 0.276 | -0.018 | 0.022 | 0.412 | -0.032 | 0.025 | 0.197 |
| rs72672425 | 13 | 113778287 | C | -0.013 | 0.016 | 0.398 | -0.016 | 0.021 | 0.448 | -0.002 | 0.023 | 0.916 |
| rs7330624 | 13 | 113313536 | C | 0.000 | 0.012 | 0.988 | -0.003 | 0.016 | 0.872 | -0.020 | 0.018 | 0.252 |
| rs73571087 | 13 | 112898048 | C | 0.007 | 0.013 | 0.601 | -0.016 | 0.017 | 0.366 | 0.029 | 0.019 | 0.137 |
| rs79754706 | 13 | 113356876 | A | -0.043 | 0.084 | 0.604 | -0.098 | 0.108 | 0.365 | -0.022 | 0.122 | 0.860 |
| rs7984604 | 13 | 112442770 | G | -0.011 | 0.020 | 0.595 | -0.018 | 0.026 | 0.485 | -0.006 | 0.029 | 0.833 |
| rs80238657 | 13 | 113092088 | G | -0.047 | 0.042 | 0.256 | -0.083 | 0.054 | 0.121 | -0.048 | 0.061 | 0.433 |
| rs9324303 | 13 | 112444969 | AAAAGCCTCCTCAGCGACAGCG | -0.022 | 0.022 | 0.317 | -0.028 | 0.029 | 0.326 | 0.001 | 0.033 | 0.976 |
| rs9525229 | 13 | 114061995 | T | -0.018 | 0.031 | 0.565 | -0.013 | 0.040 | 0.755 | -0.056 | 0.045 | 0.217 |
| rs9549405 | 13 | 113400435 | C | -0.013 | 0.012 | 0.269 | -0.013 | 0.015 | 0.401 | -0.009 | 0.017 | 0.591 |
| rs9550234 | 13 | 112849402 | C | -0.030 | 0.012 | 0.013 | -0.021 | 0.016 | 0.192 | -0.035 | 0.018 | 0.051 |
| FX | rs117471230 | 13 | 113817976 | T | 0.021 | 0.051 | 0.687 | 0.039 | 0.067 | 0.560 | 0.077 | 0.075 | 0.303 |
| rs145071104 | 13 | 113026568 | A | -0.057 | 0.039 | 0.140 | -0.061 | 0.050 | 0.221 | -0.055 | 0.057 | 0.331 |
| rs3211757 | 13 | 113135954 | AC | -0.006 | 0.012 | 0.614 | -0.009 | 0.015 | 0.557 | 0.004 | 0.017 | 0.807 |
| rs61967872 | 13 | 113249479 | T | -0.047 | 0.068 | 0.487 | -0.017 | 0.088 | 0.845 | -0.030 | 0.098 | 0.759 |
| rs7335409 | 13 | 113155872 | C | 0.000 | 0.014 | 0.975 | -0.007 | 0.018 | 0.693 | 0.016 | 0.020 | 0.429 |
| rs9549758 | 13 | 113376488 | A | -0.006 | 0.012 | 0.592 | -0.019 | 0.015 | 0.218 | 0.006 | 0.017 | 0.747 |
| rs9577463 | 13 | 113100671 | GTTTGTTTGTTTGTTTGTTTG | - | - | - | - | - | - | - | - | - |
| FXI | rs1117743 | 4 | 185973995 | T | -0.007 | 0.012 | 0.557 | 0.012 | 0.016 | 0.461 | 0.003 | 0.018 | 0.881 |
| rs116187203 | 4 | 186220581 | C | 0.018 | 0.042 | 0.674 | 0.038 | 0.054 | 0.482 | 0.001 | 0.060 | 0.983 |
| rs116347923 | 4 | 186159407 | A | 0.019 | 0.038 | 0.611 | 0.036 | 0.049 | 0.470 | 0.027 | 0.056 | 0.628 |
| rs1280096 | 4 | 186597826 | C | 0.003 | 0.013 | 0.789 | -0.019 | 0.017 | 0.248 | 0.029 | 0.019 | 0.118 |
| rs139918247 | 4 | 186259273 | TTATTATTATTAGTAGTAGT | 0.001 | 0.070 | 0.988 | -0.012 | 0.091 | 0.893 | 0.027 | 0.102 | 0.792 |
| rs148151511 | 4 | 186714332 | A | 0.005 | 0.028 | 0.868 | -0.050 | 0.036 | 0.161 | 0.043 | 0.041 | 0.287 |
| rs185320179 | 4 | 186183218 | A | -0.001 | 0.047 | 0.978 | -0.024 | 0.061 | 0.689 | 0.052 | 0.069 | 0.447 |
| rs2276920 | 4 | 186157784 | A | -0.002 | 0.016 | 0.918 | 0.008 | 0.020 | 0.688 | -0.006 | 0.023 | 0.783 |
| rs34080216 | 4 | 186475855 | T | 0.019 | 0.012 | 0.110 | 0.029 | 0.015 | 0.060 | 0.041 | 0.017 | 0.019 |
| rs3756008 | 4 | 186264231 | T | -0.007 | 0.012 | 0.546 | -0.003 | 0.015 | 0.856 | -0.026 | 0.017 | 0.127 |
| rs4862674 | 4 | 186324130 | T | -0.016 | 0.012 | 0.170 | -0.018 | 0.015 | 0.236 | -0.020 | 0.017 | 0.238 |
| rs57994834 | 4 | 186204399 | AGGCGGC | - | - | - | - | - | - | - | - | - |
| rs59020221 | 4 | 186671694 | GTCTCAAAAAAAAAAAAAAAT | 0.001 | 0.015 | 0.943 | -0.010 | 0.019 | 0.596 | 0.008 | 0.022 | 0.704 |
| rs62334687 | 4 | 186051165 | A | -0.036 | 0.024 | 0.138 | -0.032 | 0.032 | 0.306 | -0.066 | 0.036 | 0.062 |
| rs62350309 | 4 | 186356512 | G | -0.005 | 0.019 | 0.786 | -0.012 | 0.025 | 0.635 | -0.007 | 0.028 | 0.808 |
| rs6848311 | 4 | 186297664 | G | 0.026 | 0.014 | 0.060 | 0.042 | 0.018 | 0.019 | -0.007 | 0.020 | 0.728 |
| rs72709745 | 4 | 185899815 | T | 0.147 | 0.063 | 0.020 | 0.205 | 0.077 | 0.008 | -0.009 | 0.092 | 0.924 |
| rs73022727 | 4 | 186485515 | A | - | - | - | - | - | - | - | - | - |
| rs78317995 | 4 | 186422749 | A | -0.007 | 0.015 | 0.630 | -0.010 | 0.019 | 0.608 | -0.028 | 0.021 | 0.179 |
| FXIII | rs114114064 | 1 | 197622698 | A | 0.028 | 0.030 | 0.359 | -0.001 | 0.039 | 0.980 | 0.036 | 0.044 | 0.416 |
| rs1156678 | 1 | 196666644 | AA | - | - | - | - | - | - | - | - | - |
| rs1233789 | 1 | 197969200 | T | -0.004 | 0.012 | 0.716 | -0.011 | 0.015 | 0.448 | -0.010 | 0.017 | 0.554 |
| rs12746361 | 1 | 196657673 | T | -0.052 | 0.041 | 0.202 | -0.025 | 0.053 | 0.639 | -0.052 | 0.060 | 0.384 |
| rs138881853 | 1 | 196940326 | T | 0.033 | 0.031 | 0.292 | 0.056 | 0.041 | 0.165 | 0.051 | 0.046 | 0.262 |
| rs1412636 | 1 | 196982329 | A | 0.006 | 0.014 | 0.677 | -0.010 | 0.018 | 0.584 | 0.020 | 0.020 | 0.324 |
| rs145134468 | 1 | 197335802 | A | 0.049 | 0.052 | 0.351 | 0.008 | 0.068 | 0.907 | 0.087 | 0.076 | 0.255 |
| rs145456171 | 1 | 197766421 | T | -0.062 | 0.033 | 0.062 | -0.107 | 0.043 | 0.012 | -0.023 | 0.048 | 0.630 |
| rs151245361 | 1 | 196634697 | A | -0.037 | 0.057 | 0.515 | -0.070 | 0.074 | 0.348 | -0.088 | 0.083 | 0.289 |
| rs193254005 | 1 | 196041934 | A | 0.176 | 0.111 | 0.114 | 0.315 | 0.144 | 0.029 | 0.223 | 0.160 | 0.165 |
| rs36004306 | 1 | 197091956 | C | -0.019 | 0.040 | 0.633 | -0.029 | 0.052 | 0.573 | -0.060 | 0.058 | 0.299 |
| rs374088573 | 1 | 196758047 | C | - | - | - | - | - | - | - | - | - |
| rs61829156 | 1 | 197987156 | T | -0.019 | 0.032 | 0.547 | -0.027 | 0.041 | 0.507 | -0.038 | 0.047 | 0.413 |
| rs6669247 | 1 | 196521078 | A | 0.030 | 0.039 | 0.434 | 0.027 | 0.050 | 0.585 | 0.042 | 0.056 | 0.454 |
| rs72734340 | 1 | 196712246 | T | 0.009 | 0.039 | 0.807 | 0.009 | 0.050 | 0.863 | -0.030 | 0.056 | 0.600 |
| rs72736466 | 1 | 197069068 | A | 0.002 | 0.023 | 0.914 | -0.005 | 0.030 | 0.877 | 0.016 | 0.034 | 0.625 |
| rs75109228 | 1 | 196151633 | A | -0.005 | 0.017 | 0.747 | -0.023 | 0.022 | 0.284 | -0.016 | 0.025 | 0.522 |
| rs76162489 | 1 | 197248076 | G | -0.019 | 0.047 | 0.690 | -0.003 | 0.061 | 0.962 | -0.090 | 0.069 | 0.191 |
| rs77169325 | 1 | 196570208 | A | 0.007 | 0.035 | 0.836 | 0.014 | 0.045 | 0.757 | 0.022 | 0.050 | 0.669 |
| ADAMTS13 | rs10821526 | 9 | 133846443 | C | 0.006 | 0.016 | 0.709 | 0.014 | 0.021 | 0.504 | 0.002 | 0.023 | 0.935 |
| rs10993958 | 9 | 133670555 | A | -0.048 | 0.022 | 0.030 | -0.051 | 0.029 | 0.077 | -0.067 | 0.033 | 0.038 |
| rs112091335 | 9 | 132975011 | C | 0.016 | 0.036 | 0.668 | 0.046 | 0.047 | 0.324 | 0.029 | 0.053 | 0.588 |
| rs11243772 | 9 | 132417154 | A | - | - | - | - | - | - | - | - | - |
| rs112682351 | 9 | 133130486 | C | 0.074 | 0.052 | 0.153 | 0.082 | 0.067 | 0.220 | 0.070 | 0.076 | 0.356 |
| rs114510132 | 9 | 132563002 | C | 0.082 | 0.085 | 0.334 | 0.043 | 0.110 | 0.695 | 0.045 | 0.123 | 0.715 |
| rs11535670 | 9 | 133549815 | A | 0.007 | 0.015 | 0.618 | 0.007 | 0.019 | 0.705 | 0.012 | 0.021 | 0.586 |
| rs117338100 | 9 | 133117092 | T | 0.046 | 0.046 | 0.318 | 0.077 | 0.060 | 0.200 | 0.107 | 0.068 | 0.114 |
| rs117993921 | 9 | 133131462 | T | -0.008 | 0.062 | 0.895 | -0.043 | 0.080 | 0.594 | -0.004 | 0.090 | 0.966 |
| rs11998869 | 9 | 133623022 | A | -0.033 | 0.030 | 0.278 | -0.003 | 0.039 | 0.936 | -0.081 | 0.044 | 0.067 |
| rs12376985 | 9 | 134200542 | G | 0.009 | 0.020 | 0.657 | -0.012 | 0.026 | 0.635 | 0.007 | 0.029 | 0.801 |
| rs13302230 | 9 | 133539920 | A | 0.002 | 0.015 | 0.868 | 0.013 | 0.019 | 0.488 | 0.002 | 0.021 | 0.909 |
| rs141780646 | 9 | 132452046 | A | -0.031 | 0.048 | 0.518 | -0.037 | 0.062 | 0.551 | 0.002 | 0.069 | 0.972 |
| rs143714449 | 9 | 133746108 | T | -0.010 | 0.021 | 0.628 | 0.011 | 0.027 | 0.685 | -0.036 | 0.030 | 0.237 |
| rs147698451 | 9 | 134286700 | T | 0.101 | 0.083 | 0.224 | 0.139 | 0.108 | 0.198 | -0.047 | 0.123 | 0.704 |
| rs151016532 | 9 | 133239777 | T | 0.007 | 0.035 | 0.830 | -0.044 | 0.045 | 0.330 | 0.020 | 0.051 | 0.688 |
| rs1611118 | 9 | 133639801 | T | -0.026 | 0.025 | 0.303 | -0.035 | 0.032 | 0.280 | -0.034 | 0.036 | 0.356 |
| rs17149200 | 9 | 132505408 | G | -0.004 | 0.018 | 0.826 | 0.027 | 0.024 | 0.265 | -0.035 | 0.027 | 0.189 |
| rs188421457 | 9 | 134017710 | T | -0.003 | 0.039 | 0.942 | -0.007 | 0.050 | 0.890 | -0.068 | 0.057 | 0.228 |
| rs2073883 | 9 | 133888954 | T | -0.018 | 0.014 | 0.199 | -0.006 | 0.018 | 0.727 | -0.037 | 0.020 | 0.073 |
| rs2510257 | 9 | 133743547 | G | -0.006 | 0.015 | 0.668 | -0.004 | 0.019 | 0.836 | -0.007 | 0.022 | 0.750 |
| rs2519759 | 9 | 132879466 | C | -0.006 | 0.015 | 0.691 | 0.004 | 0.019 | 0.846 | -0.018 | 0.021 | 0.392 |
| rs2520001 | 9 | 133732987 | G | -0.129 | 0.083 | 0.122 | -0.111 | 0.109 | 0.310 | -0.167 | 0.119 | 0.162 |
| rs28699275 | 9 | 133413715 | T | -0.007 | 0.025 | 0.783 | 0.001 | 0.032 | 0.972 | 0.010 | 0.036 | 0.780 |
| rs2993801 | 9 | 133839604 | C | 0.066 | 0.045 | 0.137 | 0.103 | 0.058 | 0.074 | 0.076 | 0.065 | 0.241 |
| rs3124759 | 9 | 133477293 | G | -0.011 | 0.015 | 0.444 | -0.011 | 0.019 | 0.568 | -0.022 | 0.021 | 0.305 |
| rs34008151 | 9 | 133478465 | T | -0.034 | 0.083 | 0.678 | -0.130 | 0.107 | 0.225 | -0.112 | 0.120 | 0.349 |
| rs3888559 | 9 | 133600206 | AGTGTGTGTGTGGGG | - | - | - | - | - | - | - | - | - |
| rs41302673 | 9 | 133405414 | G | 0.015 | 0.020 | 0.469 | 0.023 | 0.026 | 0.387 | 0.024 | 0.030 | 0.418 |
| rs41302905 | 9 | 133255929 | T | 0.018 | 0.040 | 0.646 | -0.025 | 0.052 | 0.626 | 0.139 | 0.058 | 0.018 |
| rs429755 | 9 | 134001803 | T | 0.028 | 0.014 | 0.042 | 0.027 | 0.018 | 0.123 | -0.006 | 0.020 | 0.752 |
| rs518457 | 9 | 132511128 | G | -0.010 | 0.019 | 0.617 | -0.018 | 0.025 | 0.464 | -0.016 | 0.028 | 0.567 |
| rs551924 | 9 | 133306143 | A | -0.013 | 0.014 | 0.379 | -0.011 | 0.018 | 0.539 | 0.000 | 0.021 | 0.986 |
| rs56173051 | 9 | 132738007 | C | 0.002 | 0.029 | 0.955 | 0.030 | 0.037 | 0.426 | -0.043 | 0.042 | 0.305 |
| rs62572818 | 9 | 133735988 | G | 0.022 | 0.029 | 0.443 | 0.012 | 0.038 | 0.747 | -0.008 | 0.042 | 0.853 |
| rs72766607 | 9 | 134030696 | G | 0.021 | 0.030 | 0.481 | 0.039 | 0.039 | 0.323 | 0.023 | 0.044 | 0.597 |
| rs72769420 | 9 | 133098054 | A | 0.070 | 0.093 | 0.452 | 0.117 | 0.120 | 0.327 | -0.024 | 0.137 | 0.862 |
| rs73550037 | 9 | 133769737 | T | 0.045 | 0.074 | 0.537 | 0.060 | 0.095 | 0.529 | -0.002 | 0.107 | 0.986 |
| rs756774 | 9 | 133611775 | A | 0.055 | 0.025 | 0.027 | 0.028 | 0.032 | 0.382 | 0.052 | 0.037 | 0.157 |
| rs756812 | 9 | 133775950 | G | 0.012 | 0.033 | 0.730 | 0.033 | 0.043 | 0.446 | -0.002 | 0.049 | 0.964 |
| rs77132496 | 9 | 133096202 | T | -0.034 | 0.028 | 0.215 | -0.088 | 0.036 | 0.014 | 0.043 | 0.041 | 0.294 |
| rs80002340 | 9 | 132598862 | C | -0.009 | 0.037 | 0.803 | 0.028 | 0.048 | 0.551 | -0.024 | 0.054 | 0.657 |
| rs914852 | 9 | 134264896 | C | 0.020 | 0.017 | 0.233 | 0.005 | 0.021 | 0.799 | 0.018 | 0.024 | 0.446 |
| rs9802393 | 9 | 133539394 | T | 0.011 | 0.019 | 0.557 | 0.005 | 0.024 | 0.833 | 0.039 | 0.027 | 0.159 |
| PAI-1 | rs10953324 | 7 | 101150638 | C | 0.029 | 0.023 | 0.207 | 0.039 | 0.030 | 0.183 | - | - | - |
| rs2227666 | 7 | 101131424 | A | -0.038 | 0.027 | 0.165 | -0.040 | 0.035 | 0.252 | - | - | - |
| rs2227692 | 7 | 101135963 | T | -0.001 | 0.020 | 0.961 | -0.025 | 0.026 | 0.320 | - | - | - |
| Protein C | rs10928800 | 2 | 128083814 | G | -0.005 | 0.016 | 0.765 | -0.017 | 0.021 | 0.406 | -0.019 | 0.023 | 0.415 |
| rs111339203 | 2 | 128278142 | T | 0.015 | 0.020 | 0.460 | 0.020 | 0.025 | 0.422 | -0.011 | 0.029 | 0.713 |
| rs61185143 | 2 | 127407902 | C | 0.004 | 0.012 | 0.767 | -0.003 | 0.016 | 0.836 | -0.010 | 0.018 | 0.579 |
| rs62160169 | 2 | 127150178 | C | -0.007 | 0.027 | 0.792 | -0.045 | 0.036 | 0.201 | -0.010 | 0.040 | 0.805 |
| tPA | rs13258053 | 8 | 41772156 | T | -0.002 | 0.017 | 0.894 | -0.006 | 0.022 | 0.801 | 0.023 | 0.025 | 0.364 |
| rs146547696 | 8 | 41582154 | G | -0.017 | 0.024 | 0.492 | -0.029 | 0.031 | 0.353 | 0.013 | 0.035 | 0.709 |
| rs16891147 | 8 | 42244426 | T | 0.034 | 0.056 | 0.548 | -0.038 | 0.073 | 0.598 | 0.093 | 0.082 | 0.259 |
| rs2020921 | 8 | 42187447 | A | -0.128 | 0.063 | 0.044 | -0.087 | 0.082 | 0.288 | -0.150 | 0.093 | 0.106 |
| rs7818613 | 8 | 41866452 | T | -0.008 | 0.012 | 0.504 | -0.020 | 0.016 | 0.205 | 0.010 | 0.018 | 0.571 |
| rs78262683 | 8 | 42625612 | A | 0.018 | 0.026 | 0.478 | -0.002 | 0.034 | 0.944 | 0.040 | 0.038 | 0.297 |
| rs7833494 | 8 | 41847392 | C | -0.001 | 0.012 | 0.915 | 0.013 | 0.016 | 0.403 | -0.005 | 0.018 | 0.769 |
| vWF | rs112814955 | 12 | 6116765 | A | -0.050 | 0.022 | 0.023 | -0.030 | 0.028 | 0.286 | -0.055 | 0.032 | 0.087 |
| rs118144248 | 12 | 6003788 | G | 0.143 | 0.072 | 0.046 | 0.121 | 0.094 | 0.198 | 0.060 | 0.105 | 0.571 |
| rs151273781 | 12 | 5919899 | G | -0.010 | 0.032 | 0.762 | -0.043 | 0.041 | 0.300 | -0.026 | 0.046 | 0.577 |
| rs2283335 | 12 | 6048228 | C | 0.012 | 0.012 | 0.323 | -0.012 | 0.016 | 0.461 | 0.029 | 0.018 | 0.104 |

Abbreviations: SNP, single nucleotide polymorphisms; Chr, chromosome; FGG, Fibrinogen gamma chain; FII, Factor II; FV, Factor V; FVII, Factor VII; FX, Factor X; FXI, Factor XI; FXIII, Factor XIII; ADAMTS13, a disintegrin and metalloproteinase with a thrombospondin type 1 motif, member 13; PAI-1, Plasminogen activator inhibitor-1; tPA, tissue plasminogen activator; vWF, von Willebrand factor.

**Table S9 MR analyses of genetically predicted circulating hemostatic factors using trans-pQTLs on the risk of hypertensive disorders of pregnancy and its subtypes**

| Exposures | Outcomes | SNPs  (n) | IVW  (random effects) | | Weighted Median | | MR-Egger | |
| --- | --- | --- | --- | --- | --- | --- | --- | --- |
| OR  (95% CI) | P value | OR  (95% CI) | P value | OR  (95% CI) | P value |
| FGB | Hypertensive disorders of pregnancy | 17 | 0.925  (0.852, 1.004) | 0.062 | 0.871  (0.781, 0.971) | 0.013 | 0.921  (0.773, 1.097) | 0.37 |
| Gestational hypertension | 17 | 0.940  (0.854, 1.035) | 0.208 | 0.878  (0.766, 1.008) | 0.064 | 0.937  (0.766, 1.147) | 0.539 |
| Preeclampsia | 17 | 0.908  (0.815, 1.012) | 0.082 | 0.859  (0.747, 0.987) | 0.032 | 0.807  (0.645, 1.009) | 0.08 |
| FGG | Hypertensive disorders of pregnancy | 2 | 1.377  (1.037, 1.830) | 0.027 | - | - | - | - |
| Gestational hypertension | 2 | 1.310  (0.908, 1.891) | 0.149 | - | - | - | - |
| Preeclampsia | 2 | 1.528  (1.008, 2.313) | 0.046 | - | - | - | - |
| FII | Hypertensive disorders of pregnancy | 6 | 0.918  (0.786, 1.072) | 0.282 | 0.909  (0.751, 1.099) | 0.324 | 0.771  (0.433, 1.373) | 0.427 |
| Gestational hypertension | 6 | 1.044  (0.855, 1.276) | 0.673 | 1.083  (0.852, 1.376) | 0.515 | 1.186  (0.563, 2.501) | 0.676 |
| Preeclampsia | 6 | 0.897  (0.715, 1.126) | 0.35 | 0.822  (0.615, 1.099) | 0.186 | 0.717  (0.309, 1.663) | 0.481 |
| FIII | Hypertensive disorders of pregnancy | 1 | 1.010  (0.775, 1.317) | 0.94 | - | - | - | - |
| Gestational hypertension | 1 | 1.022  (0.726, 1.439) | 0.902 | - | - | - | - |
| Preeclampsia | 1 | 1.015  (0.690, 1.495) | 0.938 | - | - | - | - |
| FV | Hypertensive disorders of pregnancy | 18 | 1.108  (1.000, 1.230) | 0.056 | 1.047  (0.919, 1.193) | 0.487 | 0.850  (0.671, 1.076) | 0.195 |
| Gestational hypertension | 18 | 1.066  (0.930, 1.223) | 0.358 | 1.008  (0.840, 1.210) | 0.933 | 0.818  (0.600, 1.114) | 0.221 |
| Preeclampsia | 18 | 1.133  (0.982, 1.307) | 0.087 | 1.110  (0.918, 1.341) | 0.282 | 0.891  (0.631, 1.258) | 0.522 |
| FVII | Hypertensive disorders of pregnancy | 15 | 0.976  (0.893, 1.066) | 0.586 | 0.965  (0.860, 1.082) | 0.54 | 1.020  (0.836, 1.245) | 0.848 |
| Gestational hypertension | 15 | 0.955  (0.852, 1.070) | 0.428 | 1.023  (0.879, 1.190) | 0.77 | 1.112  (0.861, 1.437) | 0.432 |
| Preeclampsia | 15 | 0.970  (0.853, 1.104) | 0.645 | 0.909  (0.762, 1.083) | 0.285 | 0.834  (0.625, 1.113) | 0.24 |
| FVIII | Hypertensive disorders of pregnancy | 39 | 0.995  (0.958, 1.032) | 0.771 | 1.001  (0.954, 1.051) | 0.965 | 0.995  (0.942, 1.051) | 0.851 |
| Gestational hypertension | 39 | 0.974  (0.928, 1.023) | 0.299 | 0.980  (0.927, 1.037) | 0.491 | 0.999  (0.930, 1.073) | 0.98 |
| Preeclampsia | 39 | 1.047  (0.992, 1.106) | 0.097 | 1.026  (0.960, 1.096) | 0.446 | 1.017  (0.939, 1.101) | 0.682 |
| FIX | Hypertensive disorders of pregnancy | 3 | 0.931  (0.723, 1.198) | 0.578 | 0.966  (0.762, 1.224) | 0.773 | 1.594  (0.735, 3.455) | 0.447 |
| Gestational hypertension | 3 | 0.969  (0.731, 1.283) | 0.824 | 0.962  (0.709, 1.307) | 0.806 | 0.881  (0.279, 2.780) | 0.864 |
| Preeclampsia | 3 | 0.928  (0.562, 1.534) | 0.772 | 0.997  (0.711, 1.398) | 0.988 | 2.924  (0.946, 9.038) | 0.314 |
| FX | Hypertensive disorders of pregnancy | 14 | 0.883  (0.771, 1.012) | 0.073 | 0.922  (0.783, 1.087) | 0.332 | 0.745  (0.510, 1.090) | 0.155 |
| Gestational hypertension | 15 | 0.890  (0.761, 1.042) | 0.147 | 0.807  (0.664, 0.981) | 0.032 | 0.624  (0.416, 0.935) | 0.04 |
| Preeclampsia | 11 | 0.995  (0.774, 1.280) | 0.969 | 1.103  (0.840, 1.448) | 0.48 | 1.203  (0.601, 2.414) | 0.614 |
| FXI | Hypertensive disorders of pregnancy | 24 | 0.977  (0.913, 1.046) | 0.505 | 0.976  (0.907, 1.050) | 0.514 | 0.937  (0.838, 1.047) | 0.263 |
| Gestational hypertension | 25 | 0.984  (0.909, 1.065) | 0.69 | 1.004  (0.910, 1.107) | 0.94 | 0.955  (0.836, 1.090) | 0.499 |
| Preeclampsia | 23 | 0.979  (0.892, 1.075) | 0.657 | 0.925  (0.829, 1.031) | 0.159 | 0.925  (0.794, 1.079) | 0.332 |
| FXIII | Hypertensive disorders of pregnancy | 18 | 1.010  (0.889, 1.147) | 0.88 | 1.009  (0.858, 1.186) | 0.916 | 0.976  (0.755, 1.262) | 0.855 |
| Gestational hypertension | 19 | 0.963  (0.818, 1.134) | 0.653 | 1.054  (0.874, 1.271) | 0.579 | 0.952  (0.681, 1.332) | 0.778 |
| Preeclampsia | 19 | 1.015  (0.851, 1.210) | 0.872 | 0.971  (0.778, 1.214) | 0.798 | 1.216  (0.861, 1.718) | 0.281 |
| ADAMTS13 | Hypertensive disorders of pregnancy | 28 | 1.021  (0.932, 1.119) | 0.652 | 1.060  (0.935, 1.202) | 0.364 | 0.993  (0.837, 1.180) | 0.94 |
| Gestational hypertension | 27 | 1.046  (0.926, 1.181) | 0.472 | 1.018  (0.875, 1.183) | 0.82 | 0.953  (0.761, 1.195) | 0.682 |
| Preeclampsia | 29 | 1.066  (0.942, 1.208) | 0.311 | 1.089  (0.921, 1.289) | 0.318 | 1.118  (0.882, 1.416) | 0.365 |
| PAI-1 | Hypertensive disorders of pregnancy | 5 | 0.996  (0.776, 1.279) | 0.977 | 1.054  (0.844, 1.317) | 0.641 | 1.034  (0.410, 2.608) | 0.948 |
| Gestational hypertension | 5 | 0.981  (0.754, 1.277) | 0.887 | 1.119  (0.829, 1.511) | 0.462 | 1.122  (0.428, 2.946) | 0.83 |
| Preeclampsia | 5 | 0.961  (0.716, 1.290) | 0.792 | 0.919  (0.670, 1.261) | 0.6 | 0.861  (0.291, 2.544) | 0.804 |
| Protein C | Hypertensive disorders of pregnancy | 18 | 0.990  (0.947, 1.035) | 0.661 | 0.988  (0.933, 1.045) | 0.664 | 0.996  (0.930, 1.068) | 0.918 |
| Gestational hypertension | 19 | 0.976  (0.911, 1.046) | 0.488 | 1.014  (0.943, 1.090) | 0.706 | 1.045  (0.946, 1.155) | 0.395 |
| Preeclampsia | 17 | 0.942  (0.875, 1.015) | 0.116 | 0.943  (0.872, 1.019) | 0.138 | 0.929  (0.827, 1.044) | 0.237 |
| tPA | Hypertensive disorders of pregnancy | 18 | 1.019  (0.885, 1.174) | 0.795 | 1.078  (0.900, 1.292) | 0.414 | 1.057  (0.825, 1.353) | 0.669 |
| Gestational hypertension | 18 | 1.024  (0.870, 1.206) | 0.777 | 1.091  (0.874, 1.361) | 0.443 | 0.978  (0.735, 1.302) | 0.881 |
| Preeclampsia | 19 | 1.162  (0.954, 1.416) | 0.135 | 1.198  (0.943, 1.522) | 0.139 | 1.055  (0.741, 1.500) | 0.771 |
| vWF | Hypertensive disorders of pregnancy | 14 | 0.957  (0.888, 1.032) | 0.252 | 0.956  (0.880, 1.037) | 0.279 | 0.951  (0.834, 1.084) | 0.464 |
| Gestational hypertension | 14 | 0.950  (0.859, 1.051) | 0.316 | 0.895  (0.802, 1.000) | 0.051 | 0.928  (0.778, 1.106) | 0.42 |
| Preeclampsia | 14 | 1.058  (0.960, 1.167) | 0.253 | 1.084  (0.954, 1.232) | 0.213 | 1.039  (0.882, 1.224) | 0.657 |

Abbreviations: SNP, single nucleotide polymorphisms; Chr, chromosome; FGB, Fibrinogen, B Beta Polypeptide; FGG, Fibrinogen gamma chain; FII, Factor II; FIII, Factor III; FV, Factor V; FVII, Factor VII; FVIII, Factor VIII; FIX, Factor IX; FX, Factor X; FXI, Factor XI; FXIII, Factor XIII; ADAMTS13, a disintegrin and metalloproteinase with a thrombospondin type 1 motif, member 13; PAI-1, Plasminogen activator inhibitor-1; tPA, tissue plasminogen activator; vWF, von Willebrand factor.

**Table S10 MR Steiger test for the causal direction of circulating hemostatic factors on hypertensive disorders of pregnancy and its subtypes**

| Exposure | SNP | Chr | Position | Effect allele | Hypertensive disorders of pregnancy | Gestational hypertension | Preeclampsia |
| --- | --- | --- | --- | --- | --- | --- | --- |
| Causal direction | Causal direction | Causal direction |
| FGG | rs144431619 | 4 | 154255972 | G | TRUE | TRUE | TRUE |
| rs4220 | 4 | 154570607 | A | TRUE | TRUE | TRUE |
| FII | rs145619451 | 11 | 47533716 | G | TRUE | TRUE | TRUE |
| rs3136516 | 11 | 46739206 | A | TRUE | TRUE | TRUE |
| FV | rs112657020 | 1 | 168636503 | G | TRUE | TRUE | TRUE |
| rs115977231 | 1 | 169097491 | A | TRUE | TRUE | TRUE |
| rs12029101 | 1 | 169491627 | T | TRUE | TRUE | TRUE |
| rs1323533 | 1 | 168530981 | A | TRUE | TRUE | TRUE |
| rs2420378 | 1 | 169600680 | T | TRUE | TRUE | TRUE |
| rs34509543 | 1 | 170213185 | T | TRUE | TRUE | TRUE |
| rs556764 | 1 | 170137030 | T | TRUE | TRUE | TRUE |
| rs57248046 | 1 | 168723042 | C | TRUE | TRUE | TRUE |
| rs61806985 | 1 | 169330603 | T | TRUE | TRUE | TRUE |
| rs6427200 | 1 | 169554468 | A | TRUE | TRUE | TRUE |
| rs646441 | 1 | 168693114 | A | TRUE | TRUE | TRUE |
| rs71635620 | 1 | 169341843 | T | TRUE | TRUE | TRUE |
| rs77189102 | 1 | 168930454 | G | TRUE | TRUE | TRUE |
| rs9332676 | 1 | 169513067 | A | TRUE | TRUE | TRUE |
| rs9332693 | 1 | 169550066 | G | TRUE | TRUE | TRUE |
| rs970740 | 1 | 169510736 | T | TRUE | TRUE | TRUE |
| rs9988604 | 1 | 169196278 | G | TRUE | TRUE | TRUE |
| FVII | rs1033863 | 13 | 113099137 | A | TRUE | TRUE | TRUE |
| rs116851664 | 13 | 112622069 | G | TRUE | TRUE | TRUE |
| rs117665124 | 13 | 112732215 | C | TRUE | TRUE | TRUE |
| rs118007472 | 13 | 113348720 | A | TRUE | TRUE | TRUE |
| rs12429090 | 13 | 114051824 | T | TRUE | TRUE | TRUE |
| rs139507429 | 13 | 114038677 | T | TRUE | TRUE | TRUE |
| rs14067 | 13 | 113456345 | G | TRUE | TRUE | TRUE |
| rs144043422 | 13 | 112949484 | T | TRUE | TRUE | TRUE |
| rs147800745 | 13 | 112879323 | A | TRUE | TRUE | TRUE |
| rs149440031 | 13 | 113215099 | A | TRUE | TRUE | TRUE |
| rs185808004 | 13 | 112811300 | C | TRUE | TRUE | TRUE |
| rs186877688 | 13 | 113828127 | A | TRUE | TRUE | TRUE |
| rs192102174 | 13 | 113064852 | A | TRUE | TRUE | TRUE |
| rs2873421 | 13 | 112644812 | G | TRUE | TRUE | TRUE |
| rs34459411 | 13 | 113030019 | G | TRUE | TRUE | TRUE |
| rs4907474 | 13 | 112949591 | G | TRUE | TRUE | TRUE |
| rs497845 | 13 | 113083189 | G | TRUE | TRUE | TRUE |
| rs61967871 | 13 | 113245133 | A | TRUE | TRUE | TRUE |
| rs6577066 | 13 | 112163363 | ATCACCCACAGCCATCTCACAAAGACTT | TRUE | TRUE | TRUE |
| rs72663544 | 13 | 113084799 | CGTCCCTCACCGCATAATGCGGTGCCCGTCCCTCACCGC | TRUE | TRUE | TRUE |
| rs72672425 | 13 | 113778287 | C | TRUE | TRUE | TRUE |
| rs7330624 | 13 | 113313536 | C | TRUE | TRUE | TRUE |
| rs73571087 | 13 | 112898048 | C | TRUE | TRUE | TRUE |
| rs79754706 | 13 | 113356876 | A | TRUE | TRUE | TRUE |
| rs7984604 | 13 | 112442770 | G | TRUE | TRUE | TRUE |
| rs80238657 | 13 | 113092088 | G | TRUE | TRUE | TRUE |
| rs9324303 | 13 | 112444969 | AAAAGCCTCCTCAGCGACAGCG | TRUE | TRUE | TRUE |
| rs9525229 | 13 | 114061995 | T | TRUE | TRUE | TRUE |
| rs9549405 | 13 | 113400435 | C | TRUE | TRUE | TRUE |
| rs9550234 | 13 | 112849402 | C | TRUE | TRUE | TRUE |
| FX | rs117471230 | 13 | 113817976 | T | TRUE | TRUE | TRUE |
| rs145071104 | 13 | 113026568 | A | TRUE | TRUE | TRUE |
| rs3211757 | 13 | 113135954 | AC | TRUE | TRUE | TRUE |
| rs61967872 | 13 | 113249479 | T | TRUE | TRUE | TRUE |
| rs7335409 | 13 | 113155872 | C | TRUE | TRUE | TRUE |
| rs9549758 | 13 | 113376488 | A | TRUE | TRUE | TRUE |
| rs9577463 | 13 | 113100671 | GTTTGTTTGTTTGTTTGTTTG | - | - | - |
| FXI | rs1117743 | 4 | 185973995 | T | TRUE | TRUE | TRUE |
| rs116187203 | 4 | 186220581 | C | TRUE | TRUE | TRUE |
| rs116347923 | 4 | 186159407 | A | TRUE | TRUE | TRUE |
| rs1280096 | 4 | 186597826 | C | TRUE | TRUE | TRUE |
| rs139918247 | 4 | 186259273 | TTATTATTATTAGTAGTAGT | TRUE | TRUE | TRUE |
| rs148151511 | 4 | 186714332 | A | TRUE | TRUE | TRUE |
| rs185320179 | 4 | 186183218 | A | TRUE | TRUE | TRUE |
| rs2276920 | 4 | 186157784 | A | TRUE | TRUE | TRUE |
| rs34080216 | 4 | 186475855 | T | TRUE | TRUE | TRUE |
| rs3756008 | 4 | 186264231 | T | TRUE | TRUE | TRUE |
| rs4862674 | 4 | 186324130 | T | TRUE | TRUE | TRUE |
| rs57994834 | 4 | 186204399 | AGGCGGC | - | - | - |
| rs59020221 | 4 | 186671694 | GTCTCAAAAAAAAAAAAAAAT | TRUE | TRUE | TRUE |
| rs62334687 | 4 | 186051165 | A | TRUE | TRUE | TRUE |
| rs62350309 | 4 | 186356512 | G | TRUE | TRUE | TRUE |
| rs6848311 | 4 | 186297664 | G | TRUE | TRUE | TRUE |
| rs72709745 | 4 | 185899815 | T | TRUE | TRUE | TRUE |
| rs73022727 | 4 | 186485515 | A | - | - | - |
| rs78317995 | 4 | 186422749 | A | TRUE | TRUE | TRUE |
| FXIII | rs114114064 | 1 | 197622698 | A | TRUE | TRUE | TRUE |
| rs1156678 | 1 | 196666644 | AA | - | - | - |
| rs1233789 | 1 | 197969200 | T | TRUE | TRUE | TRUE |
| rs12746361 | 1 | 196657673 | T | TRUE | TRUE | TRUE |
| rs138881853 | 1 | 196940326 | T | TRUE | TRUE | TRUE |
| rs1412636 | 1 | 196982329 | A | TRUE | TRUE | TRUE |
| rs145134468 | 1 | 197335802 | A | TRUE | TRUE | TRUE |
| rs145456171 | 1 | 197766421 | T | TRUE | TRUE | TRUE |
| rs151245361 | 1 | 196634697 | A | TRUE | TRUE | TRUE |
| rs193254005 | 1 | 196041934 | A | TRUE | TRUE | TRUE |
| rs36004306 | 1 | 197091956 | C | TRUE | TRUE | TRUE |
| rs374088573 | 1 | 196758047 | C | - | - | - |
| rs61829156 | 1 | 197987156 | T | TRUE | TRUE | TRUE |
| rs6669247 | 1 | 196521078 | A | TRUE | TRUE | TRUE |
| rs72734340 | 1 | 196712246 | T | TRUE | TRUE | TRUE |
| rs72736466 | 1 | 197069068 | A | TRUE | TRUE | TRUE |
| rs75109228 | 1 | 196151633 | A | TRUE | TRUE | TRUE |
| rs76162489 | 1 | 197248076 | G | TRUE | TRUE | TRUE |
| rs77169325 | 1 | 196570208 | A | TRUE | TRUE | TRUE |
| ADAMTS13 | rs10821526 | 9 | 133846443 | C | TRUE | TRUE | TRUE |
| rs10993958 | 9 | 133670555 | A | TRUE | TRUE | TRUE |
| rs112091335 | 9 | 132975011 | C | TRUE | TRUE | TRUE |
| rs11243772 | 9 | 132417154 | A | - | - | - |
| rs112682351 | 9 | 133130486 | C | TRUE | TRUE | TRUE |
| rs114510132 | 9 | 132563002 | C | TRUE | TRUE | TRUE |
| rs11535670 | 9 | 133549815 | A | TRUE | TRUE | TRUE |
| rs117338100 | 9 | 133117092 | T | TRUE | TRUE | TRUE |
| rs117993921 | 9 | 133131462 | T | TRUE | TRUE | TRUE |
| rs11998869 | 9 | 133623022 | A | TRUE | TRUE | TRUE |
| rs12376985 | 9 | 134200542 | G | TRUE | TRUE | TRUE |
| rs13302230 | 9 | 133539920 | A | TRUE | TRUE | TRUE |
| rs141780646 | 9 | 132452046 | A | TRUE | TRUE | TRUE |
| rs143714449 | 9 | 133746108 | T | TRUE | TRUE | TRUE |
| rs147698451 | 9 | 134286700 | T | TRUE | TRUE | TRUE |
| rs151016532 | 9 | 133239777 | T | TRUE | TRUE | TRUE |
| rs1611118 | 9 | 133639801 | T | TRUE | TRUE | TRUE |
| rs17149200 | 9 | 132505408 | G | TRUE | TRUE | TRUE |
| rs188421457 | 9 | 134017710 | T | TRUE | TRUE | TRUE |
| rs2073883 | 9 | 133888954 | T | TRUE | TRUE | TRUE |
| rs2510257 | 9 | 133743547 | G | TRUE | TRUE | TRUE |
| rs2519759 | 9 | 132879466 | C | TRUE | TRUE | TRUE |
| rs2520001 | 9 | 133732987 | G | TRUE | TRUE | TRUE |
| rs28699275 | 9 | 133413715 | T | TRUE | TRUE | TRUE |
| rs2993801 | 9 | 133839604 | C | TRUE | TRUE | TRUE |
| rs3124759 | 9 | 133477293 | G | TRUE | TRUE | TRUE |
| rs34008151 | 9 | 133478465 | T | TRUE | TRUE | TRUE |
| rs3888559 | 9 | 133600206 | AGTGTGTGTGTGGGG | - | - | - |
| rs41302673 | 9 | 133405414 | G | TRUE | TRUE | TRUE |
| rs41302905 | 9 | 133255929 | T | TRUE | TRUE | TRUE |
| rs429755 | 9 | 134001803 | T | TRUE | TRUE | TRUE |
| rs518457 | 9 | 132511128 | G | TRUE | TRUE | TRUE |
| rs551924 | 9 | 133306143 | A | TRUE | TRUE | TRUE |
| rs56173051 | 9 | 132738007 | C | TRUE | TRUE | TRUE |
| rs62572818 | 9 | 133735988 | G | TRUE | TRUE | TRUE |
| rs72766607 | 9 | 134030696 | G | TRUE | TRUE | TRUE |
| rs72769420 | 9 | 133098054 | A | TRUE | TRUE | TRUE |
| rs73550037 | 9 | 133769737 | T | TRUE | TRUE | TRUE |
| rs756774 | 9 | 133611775 | A | TRUE | TRUE | TRUE |
| rs756812 | 9 | 133775950 | G | TRUE | TRUE | TRUE |
| rs77132496 | 9 | 133096202 | T | TRUE | TRUE | TRUE |
| rs80002340 | 9 | 132598862 | C | TRUE | TRUE | TRUE |
| rs914852 | 9 | 134264896 | C | TRUE | TRUE | TRUE |
| rs9802393 | 9 | 133539394 | T | TRUE | TRUE | TRUE |
| PAI-1 | rs10953324 | 7 | 101150638 | C | TRUE | TRUE | TRUE |
| rs2227666 | 7 | 101131424 | A | TRUE | TRUE | TRUE |
| rs2227692 | 7 | 101135963 | T | TRUE | TRUE | TRUE |
| Protein C | rs10928800 | 2 | 128083814 | G | TRUE | TRUE | TRUE |
| rs111339203 | 2 | 128278142 | T | TRUE | TRUE | TRUE |
| rs61185143 | 2 | 127407902 | C | TRUE | TRUE | TRUE |
| rs62160169 | 2 | 127150178 | C | TRUE | TRUE | TRUE |
| tPA | rs13258053 | 8 | 41772156 | T | TRUE | TRUE | TRUE |
| rs146547696 | 8 | 41582154 | G | TRUE | TRUE | TRUE |
| rs16891147 | 8 | 42244426 | T | TRUE | TRUE | TRUE |
| rs2020921 | 8 | 42187447 | A | TRUE | TRUE | TRUE |
| rs7818613 | 8 | 41866452 | T | TRUE | TRUE | TRUE |
| rs78262683 | 8 | 42625612 | A | TRUE | TRUE | TRUE |
| rs7833494 | 8 | 41847392 | C | TRUE | TRUE | TRUE |
| vWF | rs112814955 | 12 | 6116765 | A | TRUE | TRUE | TRUE |
| rs118144248 | 12 | 6003788 | G | TRUE | TRUE | TRUE |
| rs151273781 | 12 | 5919899 | G | TRUE | TRUE | TRUE |
| rs2283335 | 12 | 6048228 | C | TRUE | TRUE | TRUE |

Abbreviations: SNP, single nucleotide polymorphisms; Chr, chromosome; FGG, Fibrinogen gamma chain; FII, Factor II; FV, Factor V; FVII, Factor VII; FX, Factor X; FXI, Factor XI; FXIII, Factor XIII; ADAMTS13, a disintegrin and metalloproteinase with a thrombospondin type 1 motif, member 13; PAI-1, Plasminogen activator inhibitor-1; tPA, tissue plasminogen activator; vWF, von Willebrand factor.

**Table S11. Summary of Bayesian colocalization analysis for genetically predicted circulating hemostatic factors levels and preeclampsia risk**

| Exposure Protein | Genomic Locus | No. of SNPs | PP H0 | PP H1 | PP H2 | PP H3 | PP H4 | Conclusion |
| --- | --- | --- | --- | --- | --- | --- | --- | --- |
| FII | F2 gene  (Chr11) | 6729 | 2.50E-28 | 0.586271996 | 1.62E-28 | 0.379720248 | 0.034007756 | No evidence of colocalization |
| FV | F5 gene  (Chr1) | 10588 | 1.10E-245 | 0.631443361 | 6.24E-246 | 0.357344893 | 0.011211747 | No evidence of colocalization |
| vWF | VWF gene  (Chr12) | 9915 | 3.23E-140 | 0.61386585 | 1.88E-140 | 0.357796852 | 0.028337298 | No evidence of colocalization |
